# Supplementary material for: Regio- and stereoselective synthesis of novel spiropyrrolidines through 1,3-dipolar cycloaddition reactions of azomethine ylides and 2-styrylquinazolin-4(3H)-ones
Source: Royal Society of Chemistry journal article supplement (doi:10.1039/c4ra03508a), 2014-01-01
Supplement: c4ra03508a1.pdf [file c4ra03508a1.pdf]

Supporting information for “**Regio- and stereoselective synthesis of novel spiropyrrolidines through 1,3-dipolar cycloaddition reactions of azomethine ylides and 2-styrylquinazolin-4(3H)-ones**”

**Contents**

|                                                                     |                        |
|---------------------------------------------------------------------|------------------------|
| Crystallographic data for compound <b>4a</b>                        | <b>Page no. S2-S3</b>  |
| <sup>1</sup> H and <sup>13</sup> C Spectra of compounds <b>4a-p</b> | <b>Page no. S4-S35</b> |
| 2D DQFCOSY spectrum of compound <b>4p</b>                           | <b>Page no. S36</b>    |
| 2D NOESY spectrum of compound <b>4p</b>                             | <b>Page no. S37</b>    |

Crystallographic data for AU95 (compound **4a**)

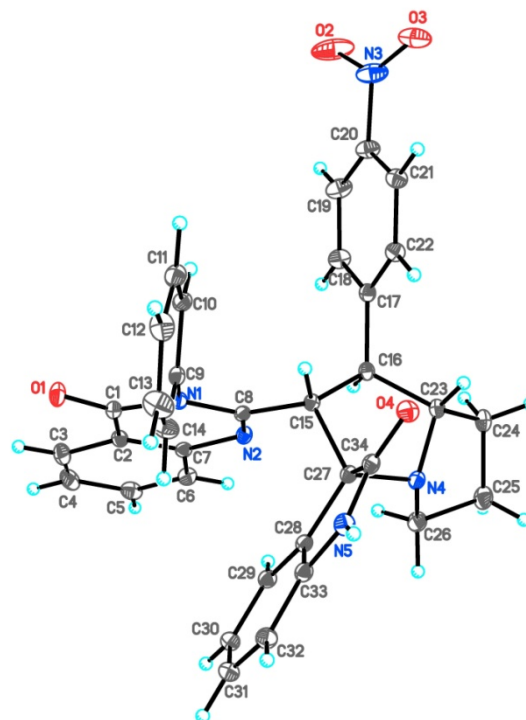

Figure caption: The molecular structure of AU95 (compound **4a**) with the atom-numbering scheme. Displacement ellipsoids are drawn at the 10% probability level and H atoms are shown as small spheres of arbitrary radius.

Crystal data for AU95:  $C_{34}H_{27}N_5O_4$ ,  $M = 569.61$ , orange rectangle,  $0.49 \times 0.18 \times 0.12 \text{ mm}^3$ , monoclinic, space group  $P2_1/c$  (No. 14),  $a = 15.9316(13)$ ,  $b = 11.8821(10)$ ,  $c = 15.2579(12) \text{ \AA}$ ,  $\beta = 103.5740(10)^\circ$ ,  $V = 2807.7(4) \text{ \AA}^3$ ,  $Z = 4$ ,  $D_c = 1.348 \text{ g/cm}^3$ ,  $F_{000} = 1192$ , CCD area detector, MoK $\alpha$  radiation,  $\lambda = 0.71073$

Å,  $T = 293(2)\text{K}$ ,  $2\theta_{\text{max}} = 50.0^\circ$ , 26396 reflections collected, 4927 unique ( $R_{\text{int}} = 0.0238$ ), Final GooF = 1.048,  $R1 = 0.0384$ ,  $wR2 = 0.0979$ ,  $R$  indices based on 4249 reflections with  $I > 2\sigma(I)$  (refinement on  $F^2$ ), 392 parameters,  $\mu = 0.091 \text{ mm}^{-1}$ . CCDC 994872 contains the supplementary crystallographic data for this paper. These data can be obtained free of charge at [www.ccdc.cam.ac.uk/conts/retrieving.html](http://www.ccdc.cam.ac.uk/conts/retrieving.html) or from the Cambridge Crystallographic Data Centre (CCDC), 12 Union Road, Cambridge CB2 1EZ, UK; fax: +44(0) 1223 336 033; email: [deposit@ccdc.cam.ac.uk](mailto:deposit@ccdc.cam.ac.uk).

X-ray data for the compound were collected at room temperature using a Bruker Smart Apex CCD diffractometer with graphite monochromated MoK $\alpha$  radiation ( $\lambda=0.71073\text{Å}$ ) with  $\omega$ -scan method.<sup>1</sup> Preliminary lattice parameters and orientation matrices were obtained from four sets of frames. Unit cell dimensions were determined using 5516 reflections for AU95 data. Integration and scaling of intensity data were accomplished using SAINT program.<sup>1</sup> The structures were solved by Direct Methods using SHELXS97<sup>2</sup> and refinement was carried out by full-matrix least-squares technique using SHELXL97.<sup>2</sup> Anisotropic displacement parameters were included for all non-hydrogen atoms. All H atoms were positioned geometrically and treated as riding on their parent C atoms, with C-H distances of 0.93--0.97 Å, and with  $U_{\text{iso}}(\text{H}) = 1.2U_{\text{eq}}(\text{C})$  or  $1.5U_{\text{eq}}$  for methyl atoms.

#### References:

1. SMART & SAINT. Software Reference manuals. Versions 6.28a & 5.625, Bruker Analytical X-ray Systems Inc., Madison, Wisconsin, U.S.A., 2001.
2. Sheldrick, G. M. SHELXS97 and SHELXL97, Programs for crystal structure solution and refinement; University of Gottingen: Germany, 1997.

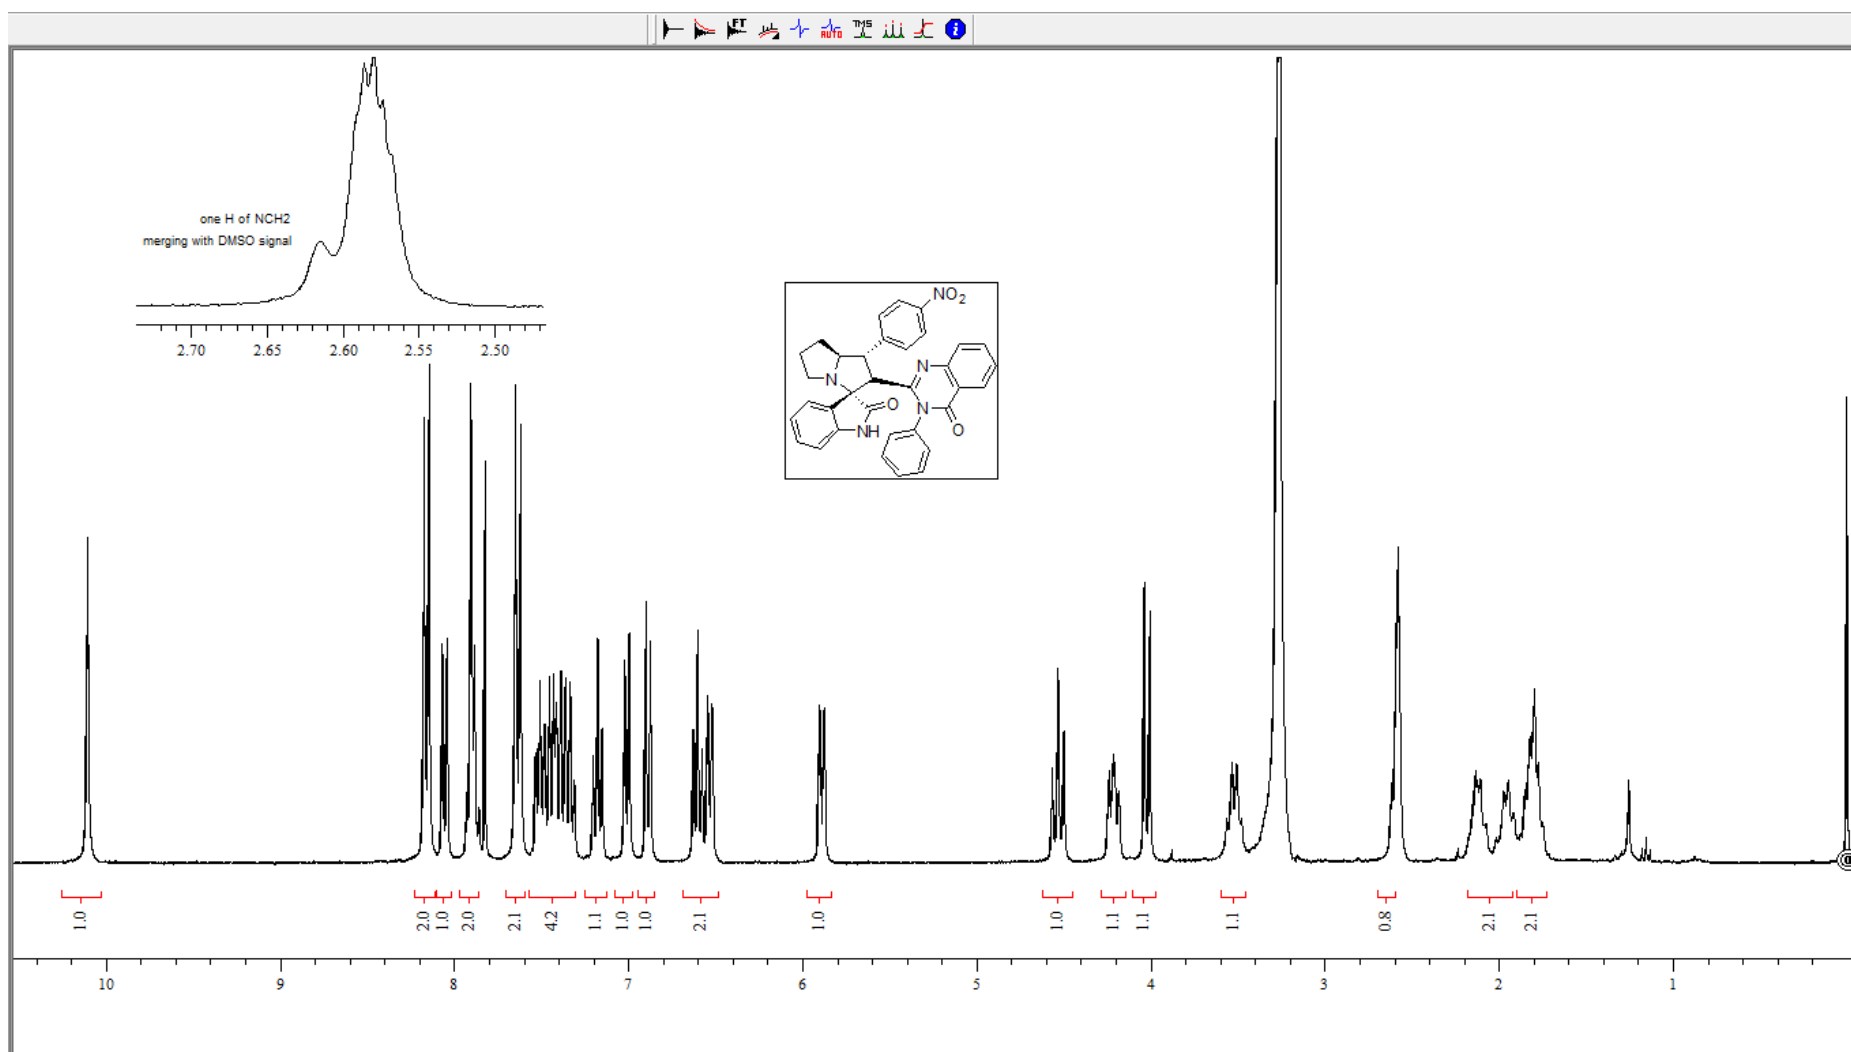

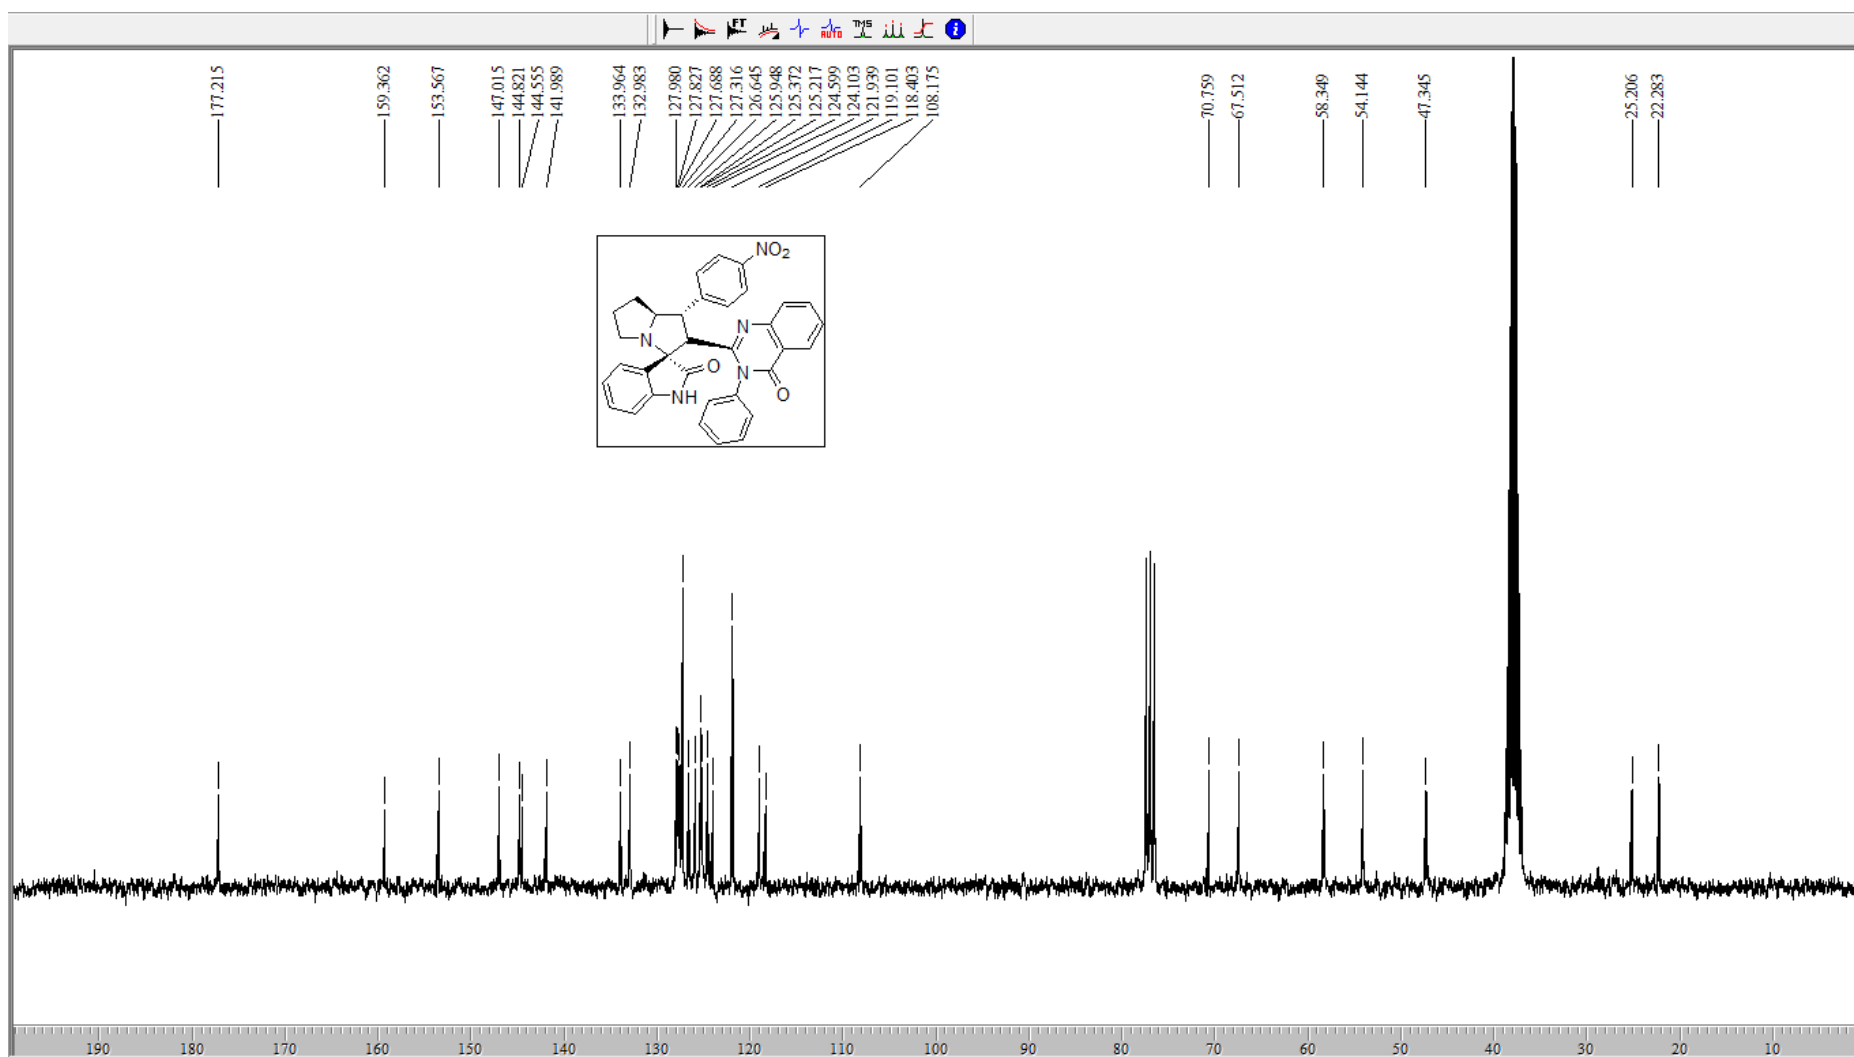

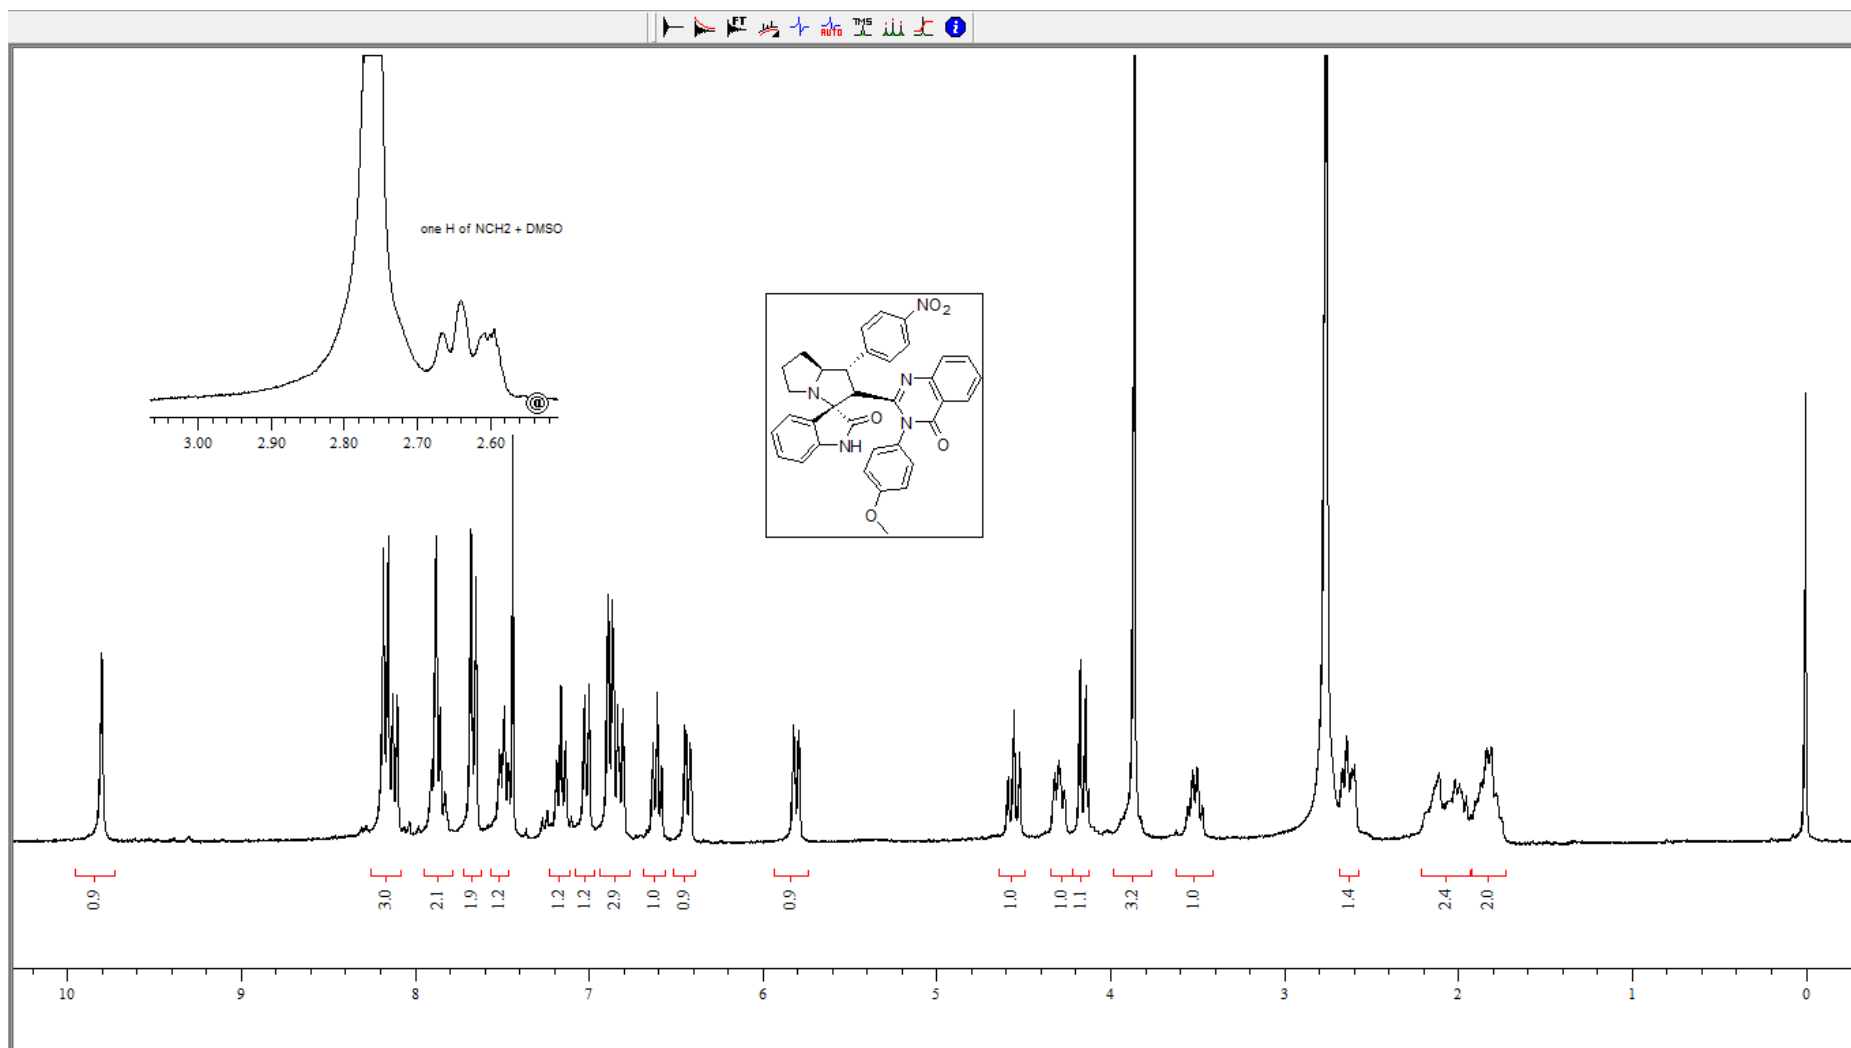

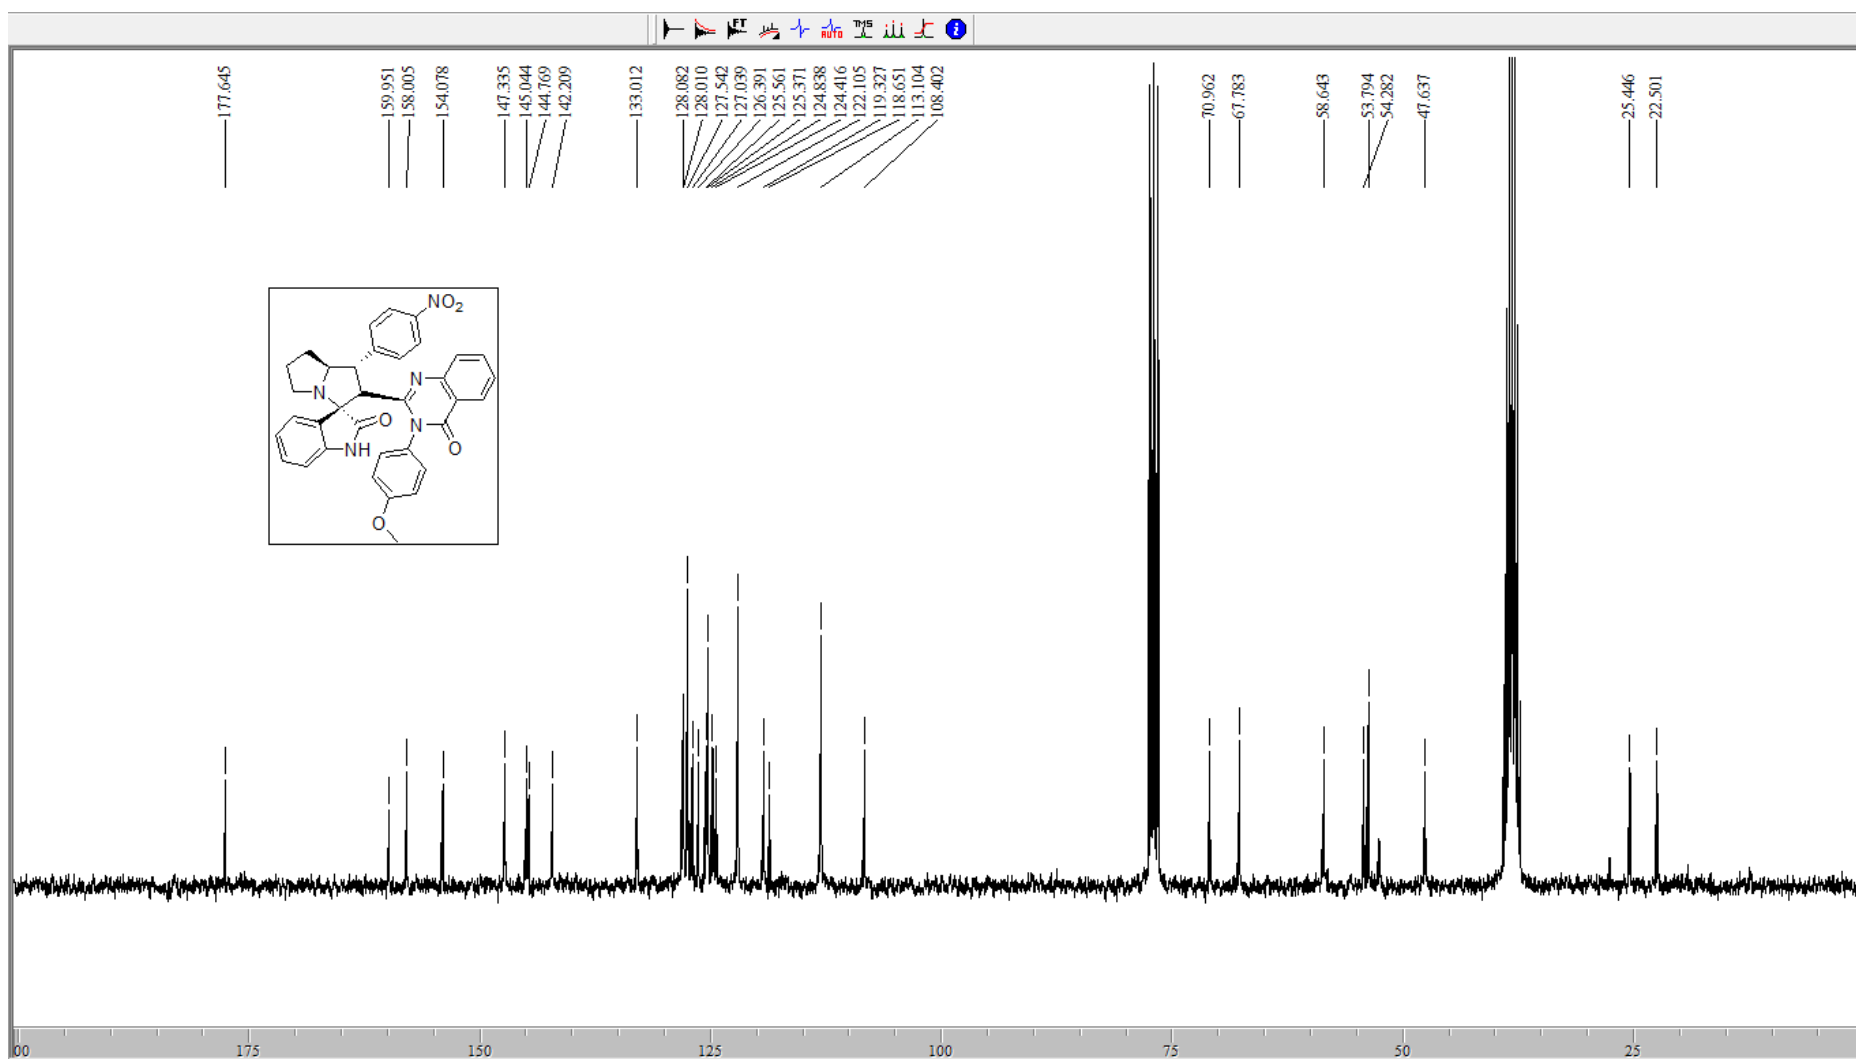

177.645

159.951

158.005

154.078

147.335

145.044

144.769

142.209

133.012

128.082

128.010

127.542

127.039

126.391

125.561

125.371

124.838

124.416

122.105

119.327

118.651

113.104

108.402

70.962

67.783

58.643

53.794

54.282

47.637

25.446

22.501

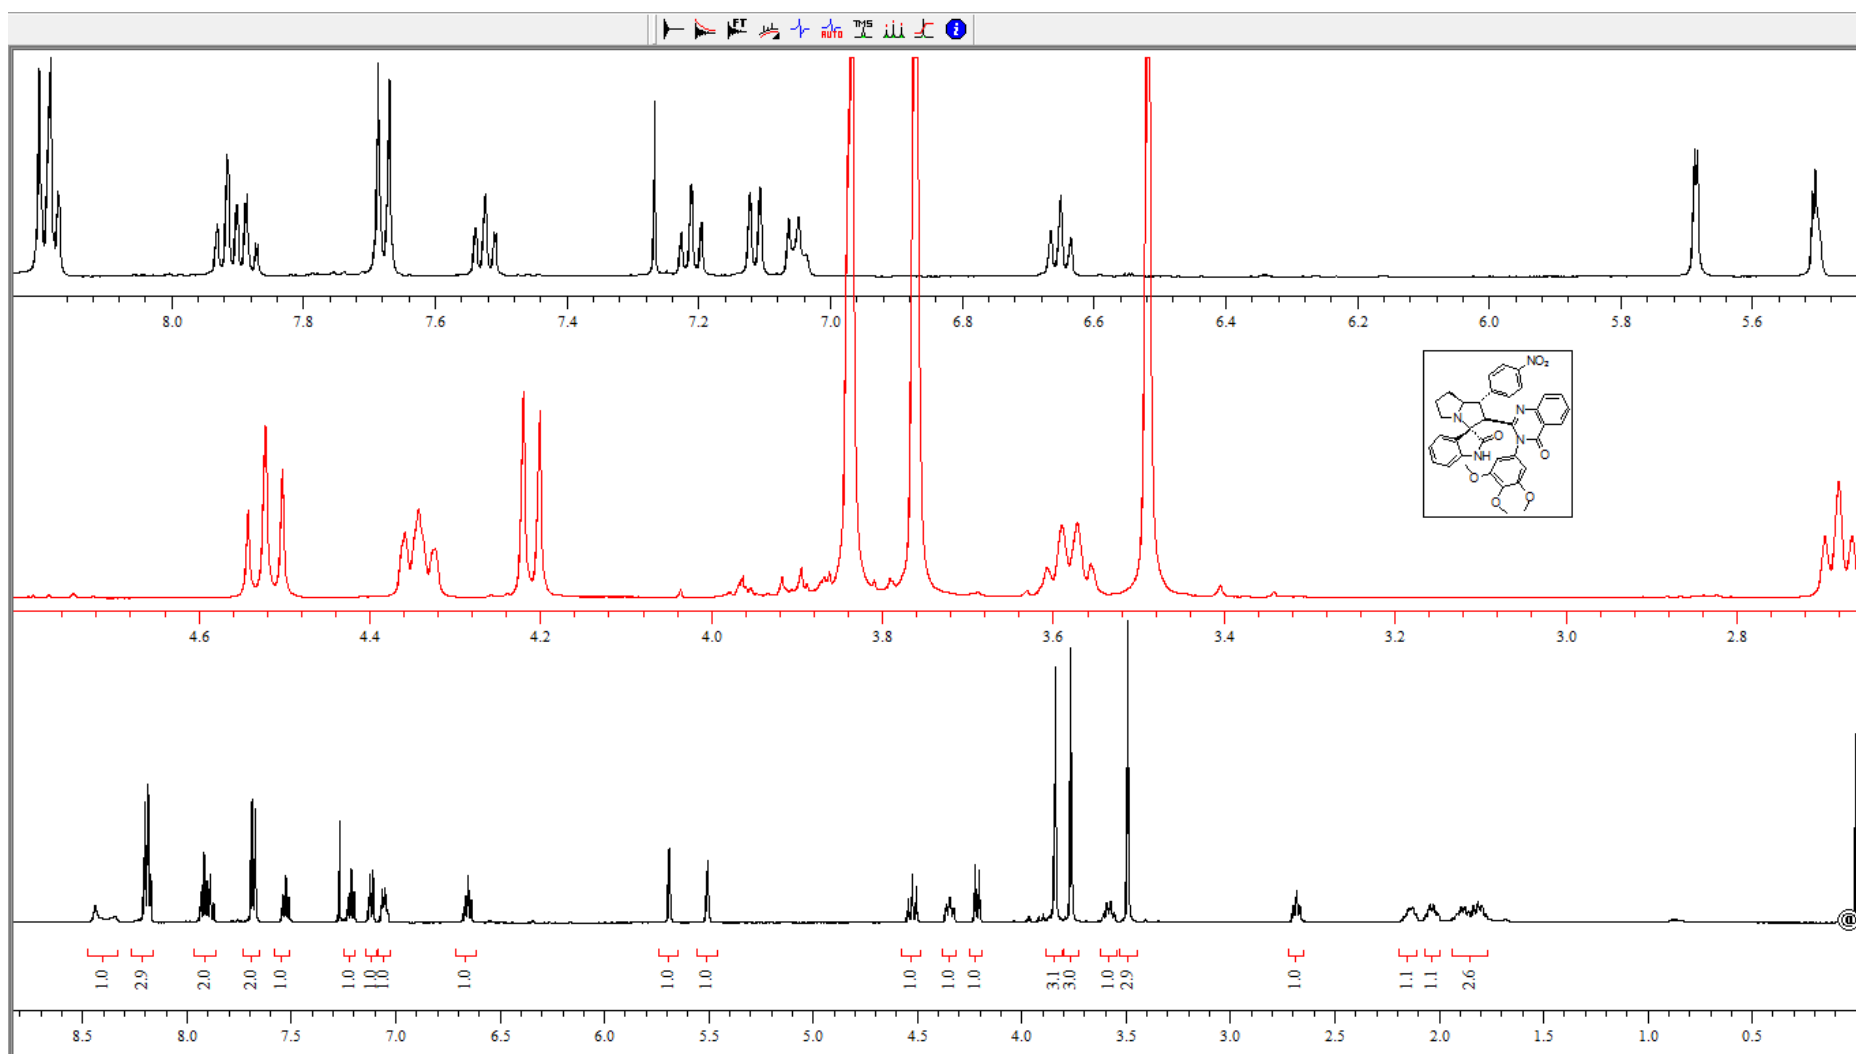



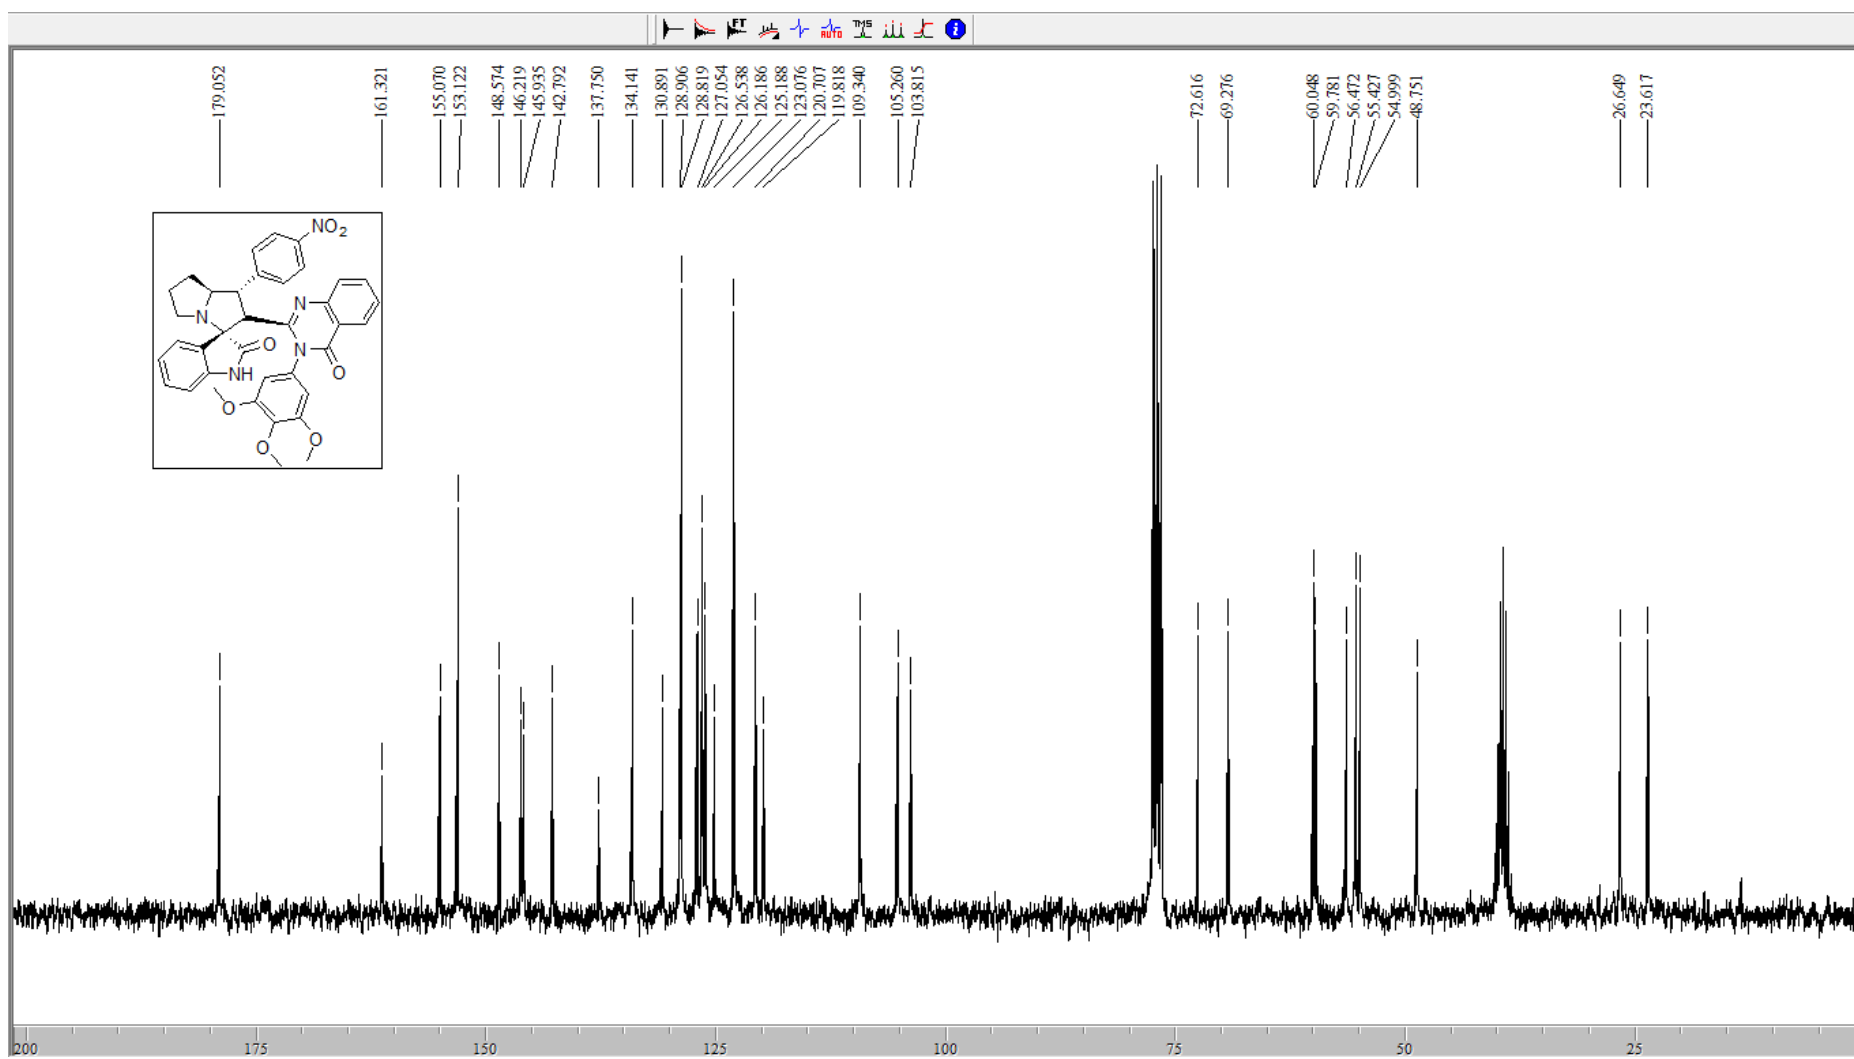

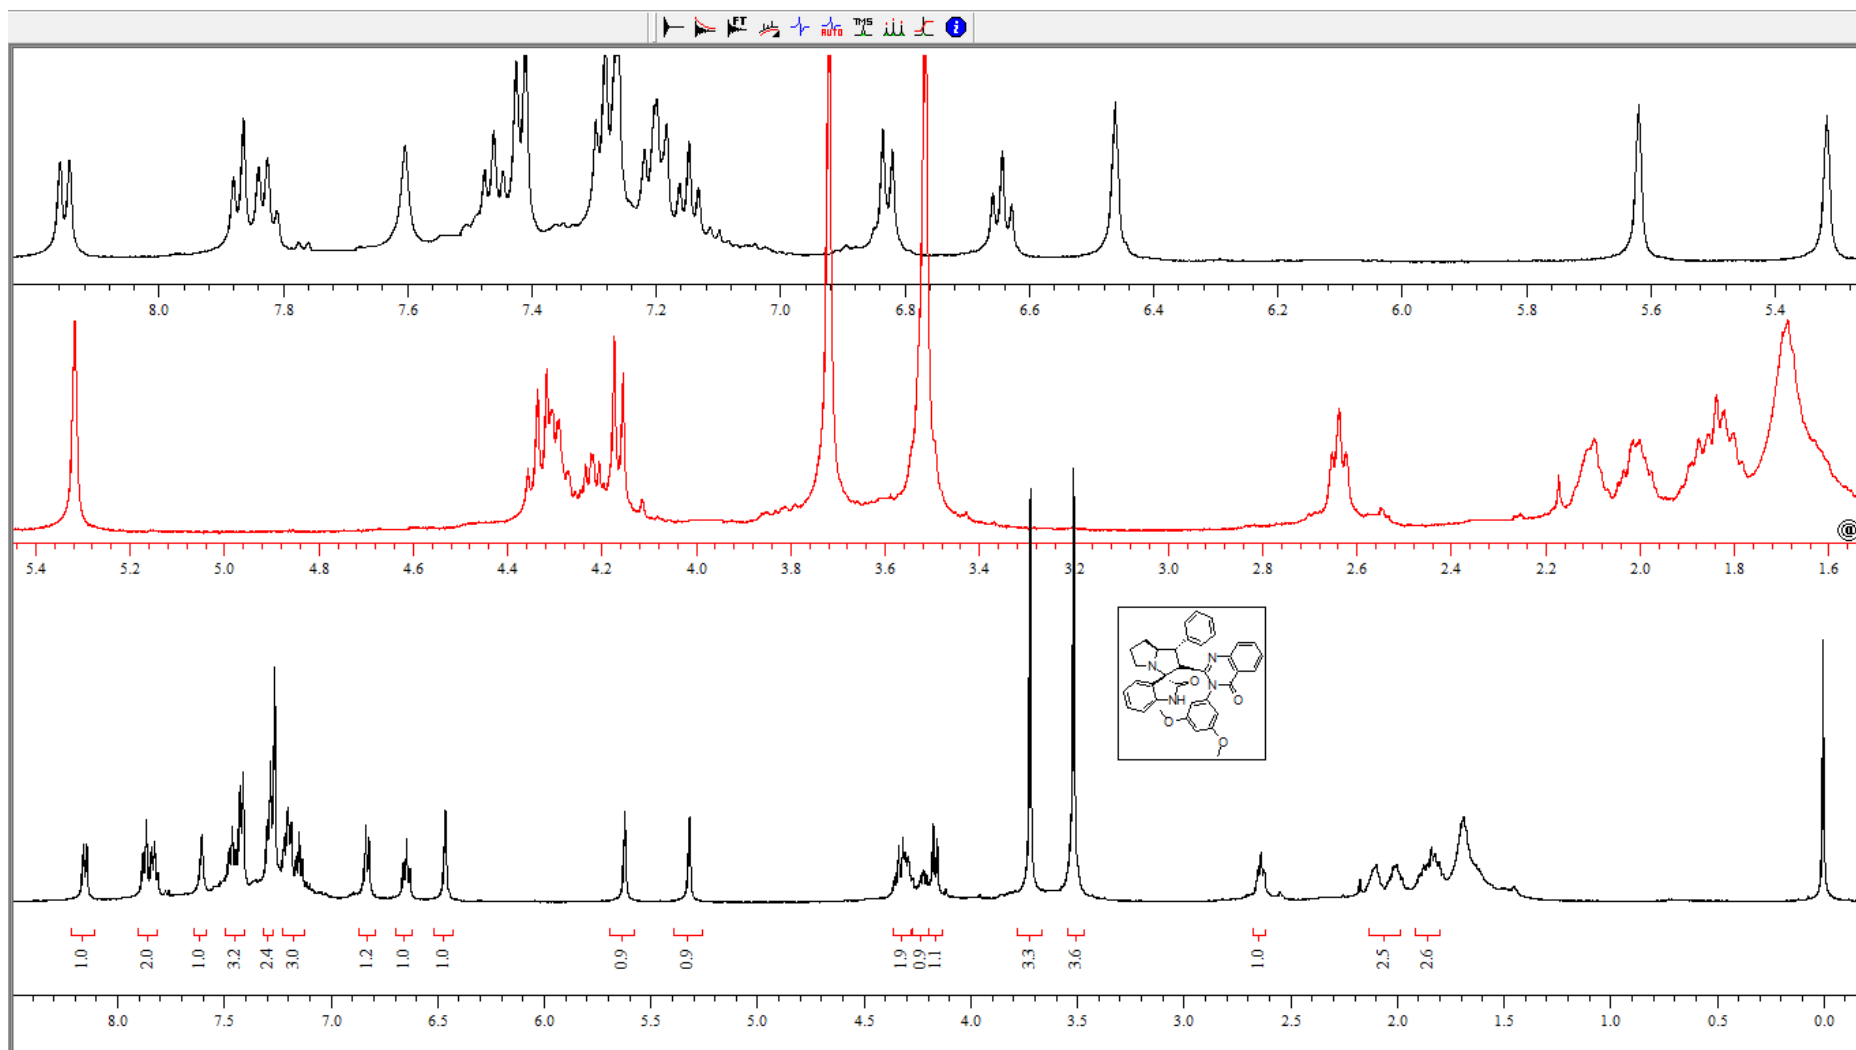

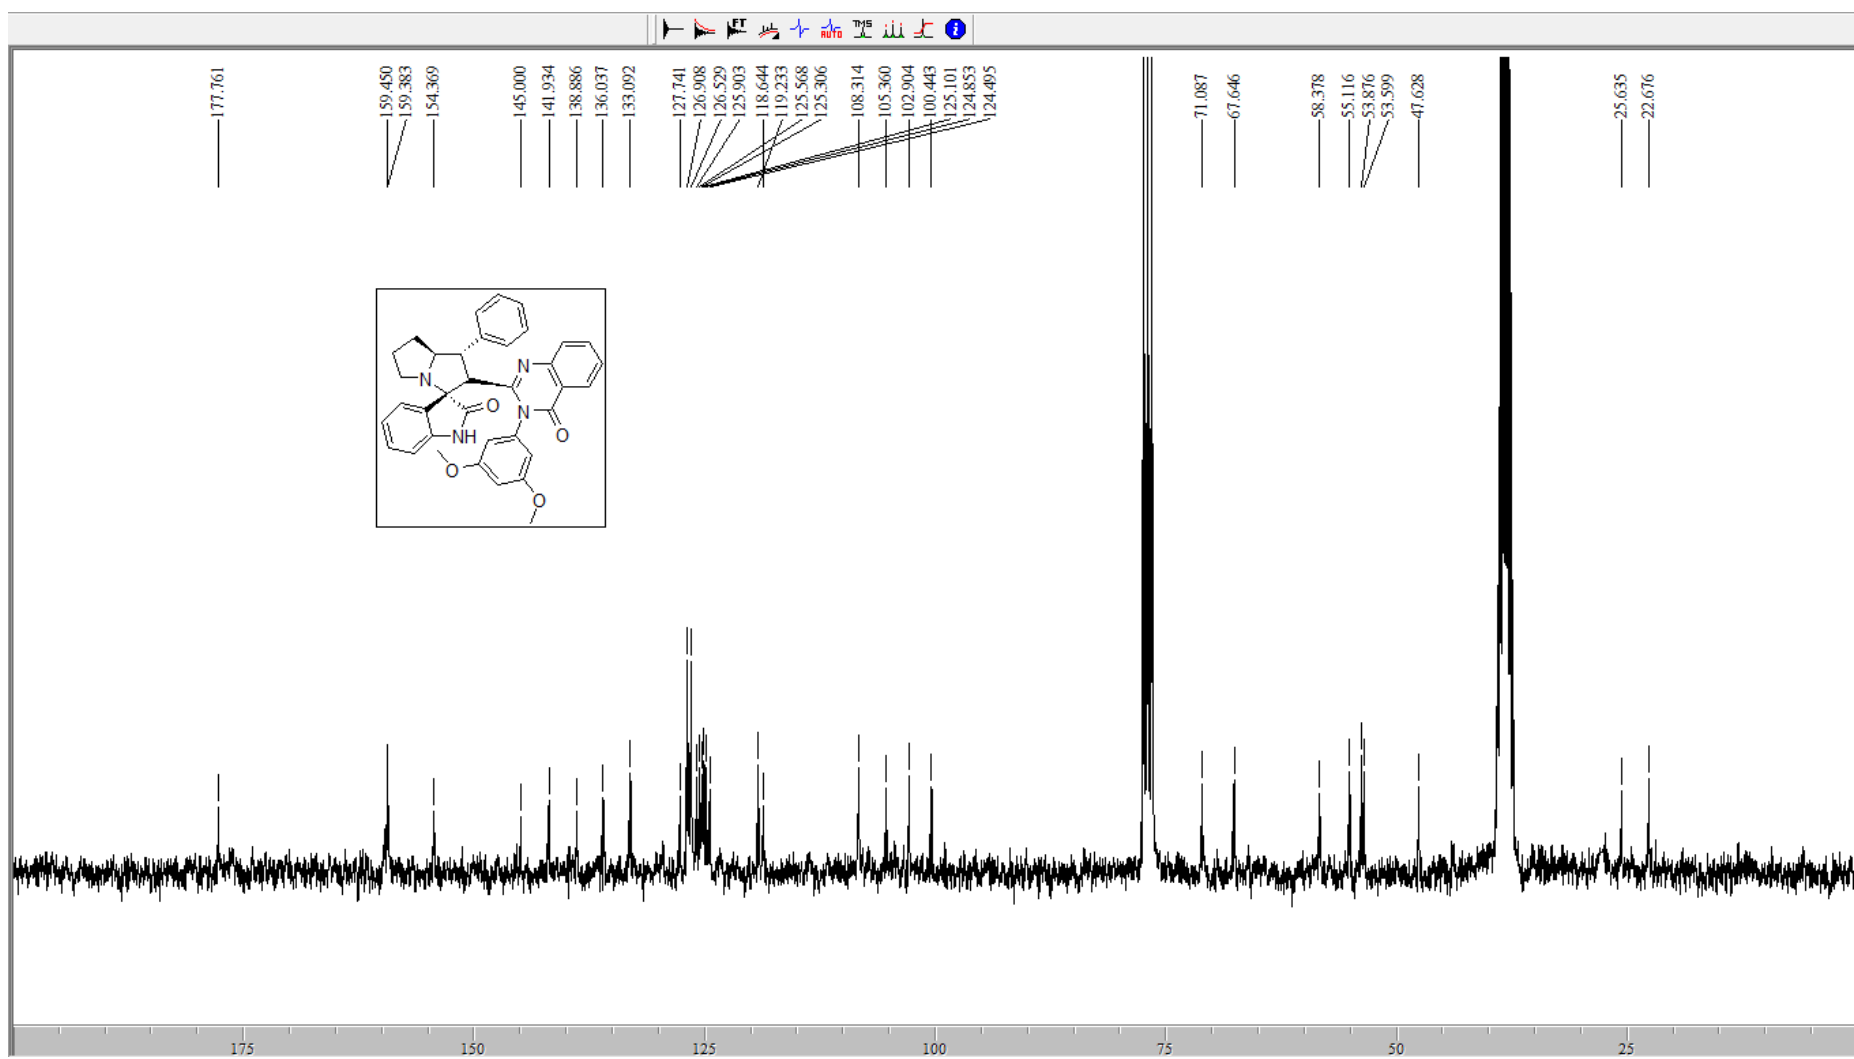

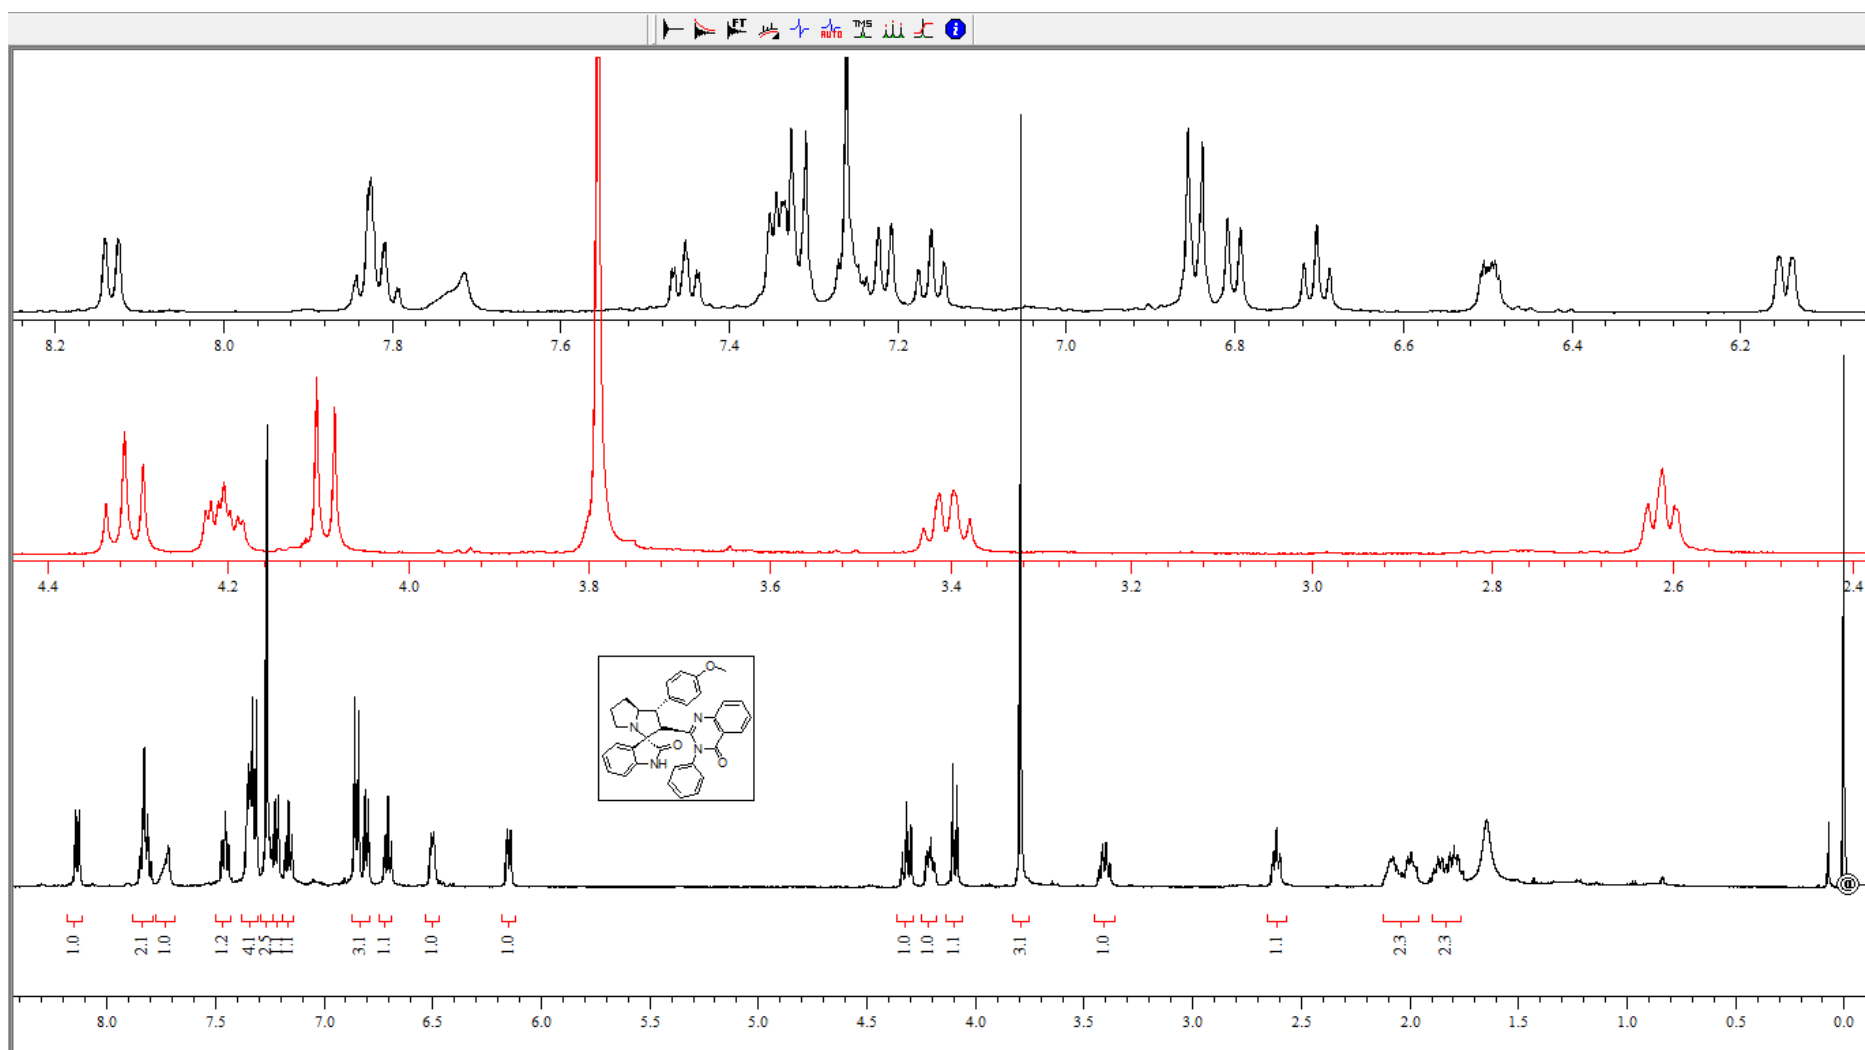

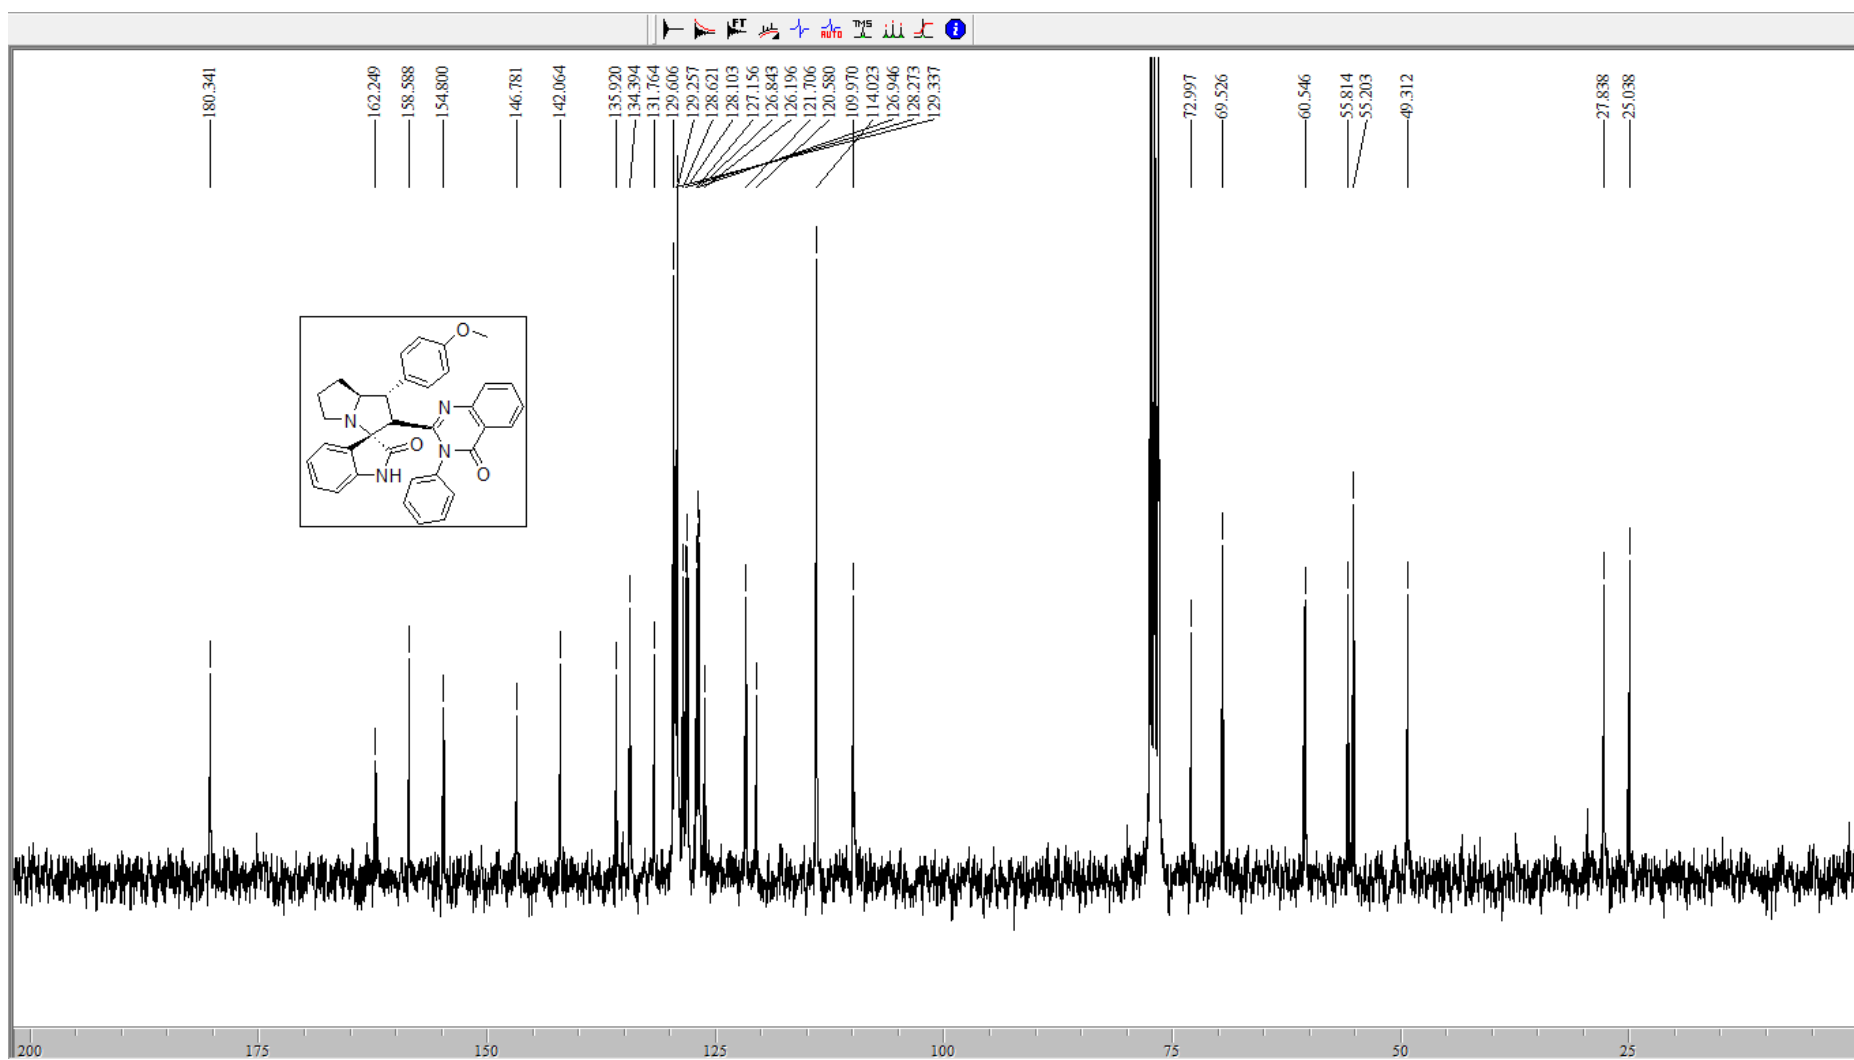

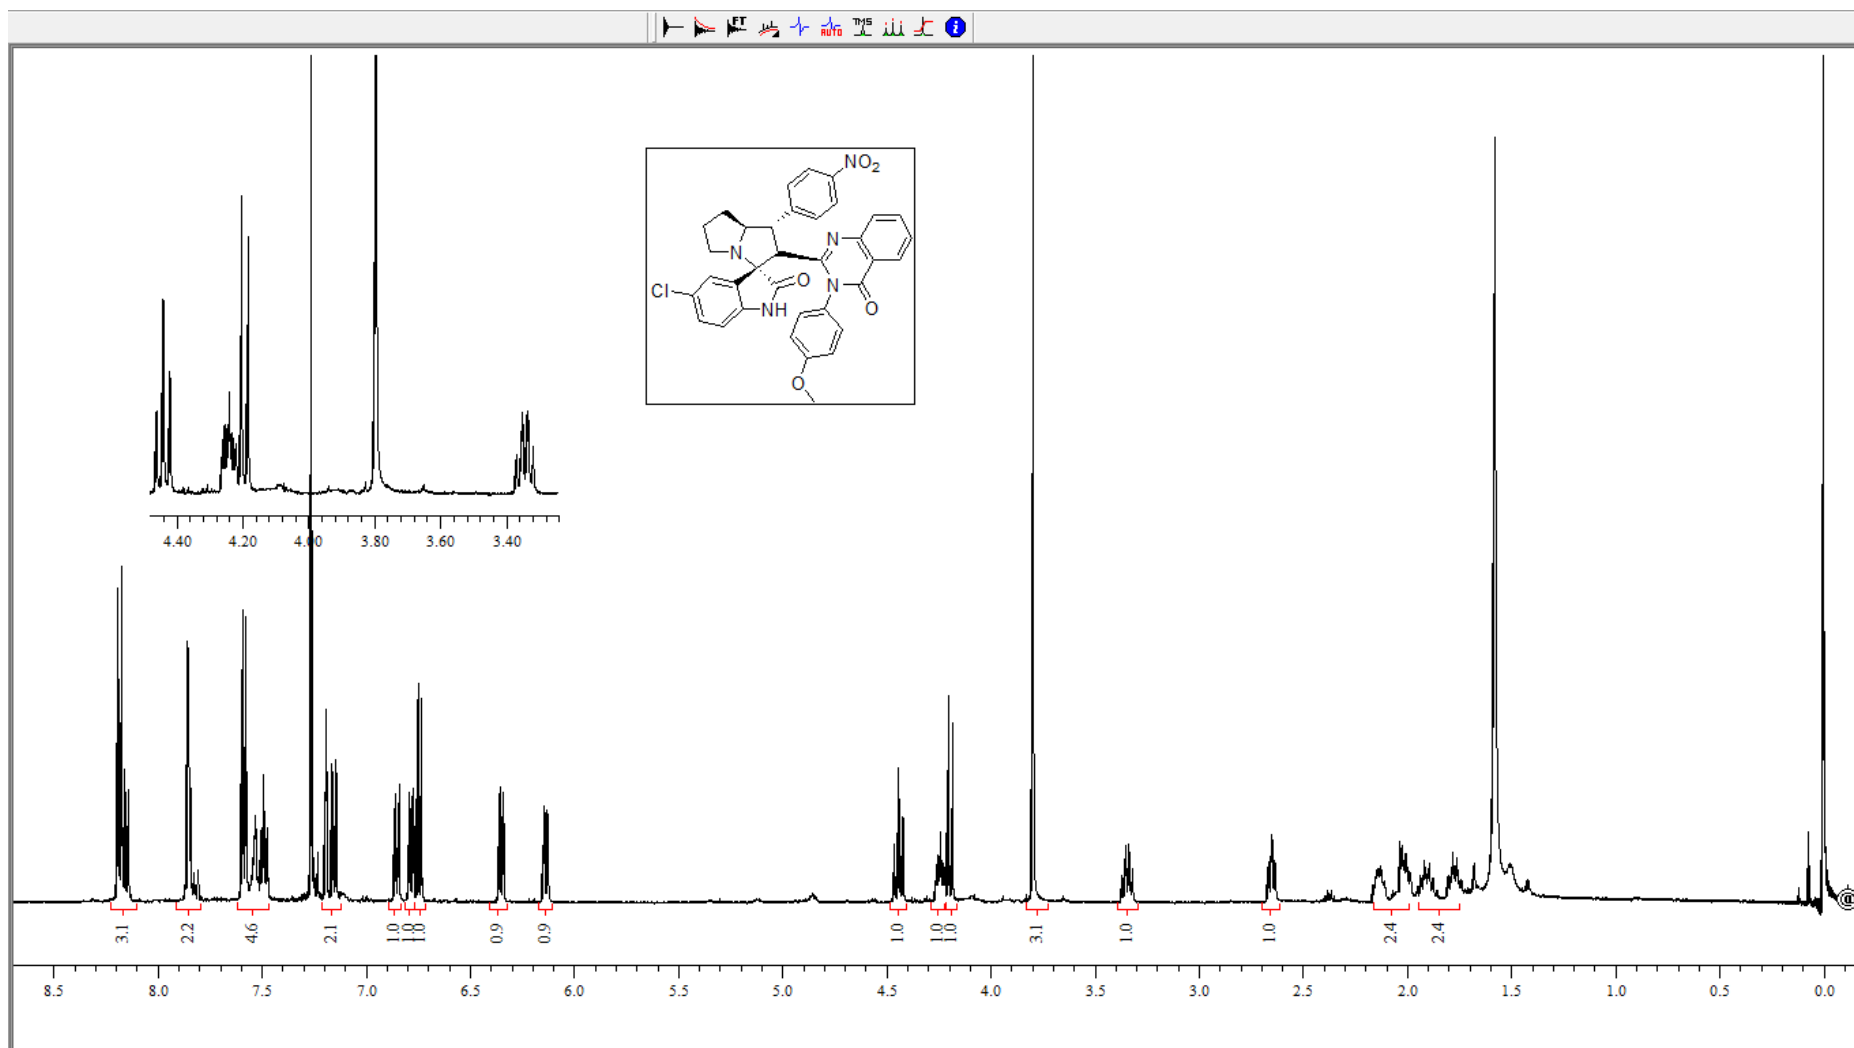

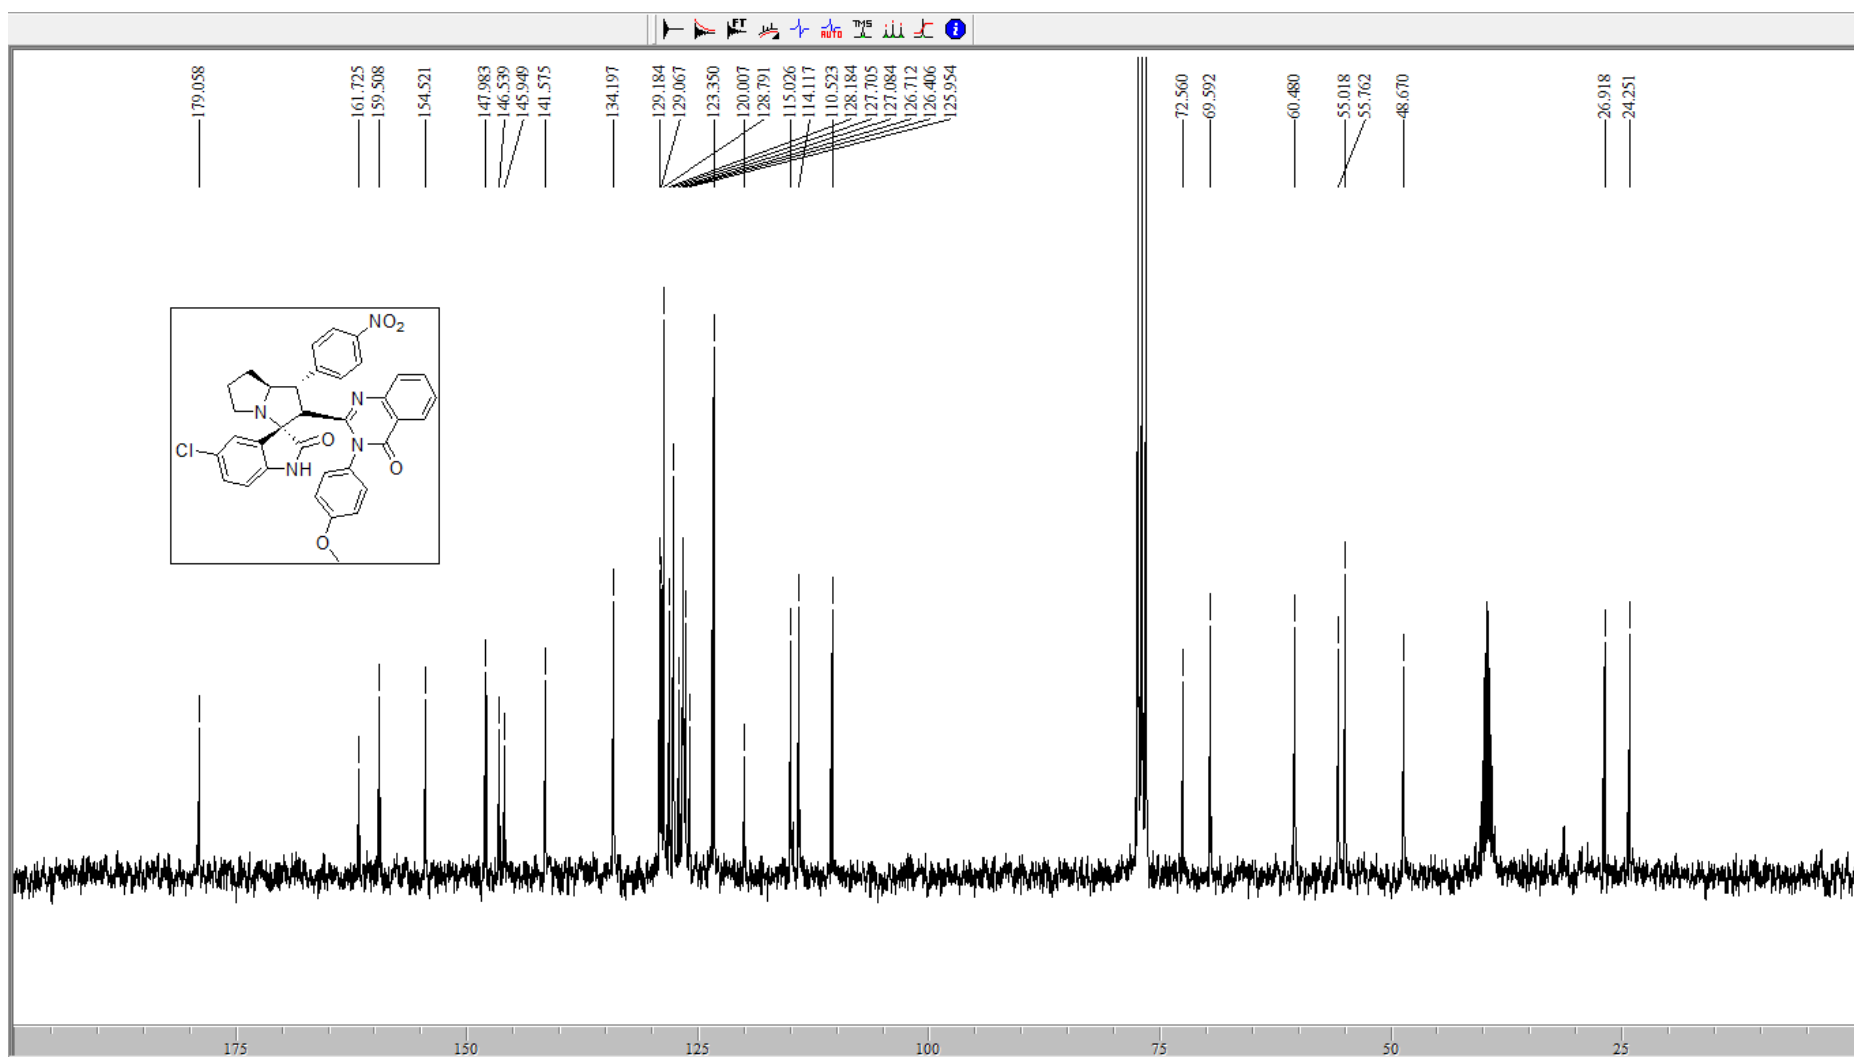

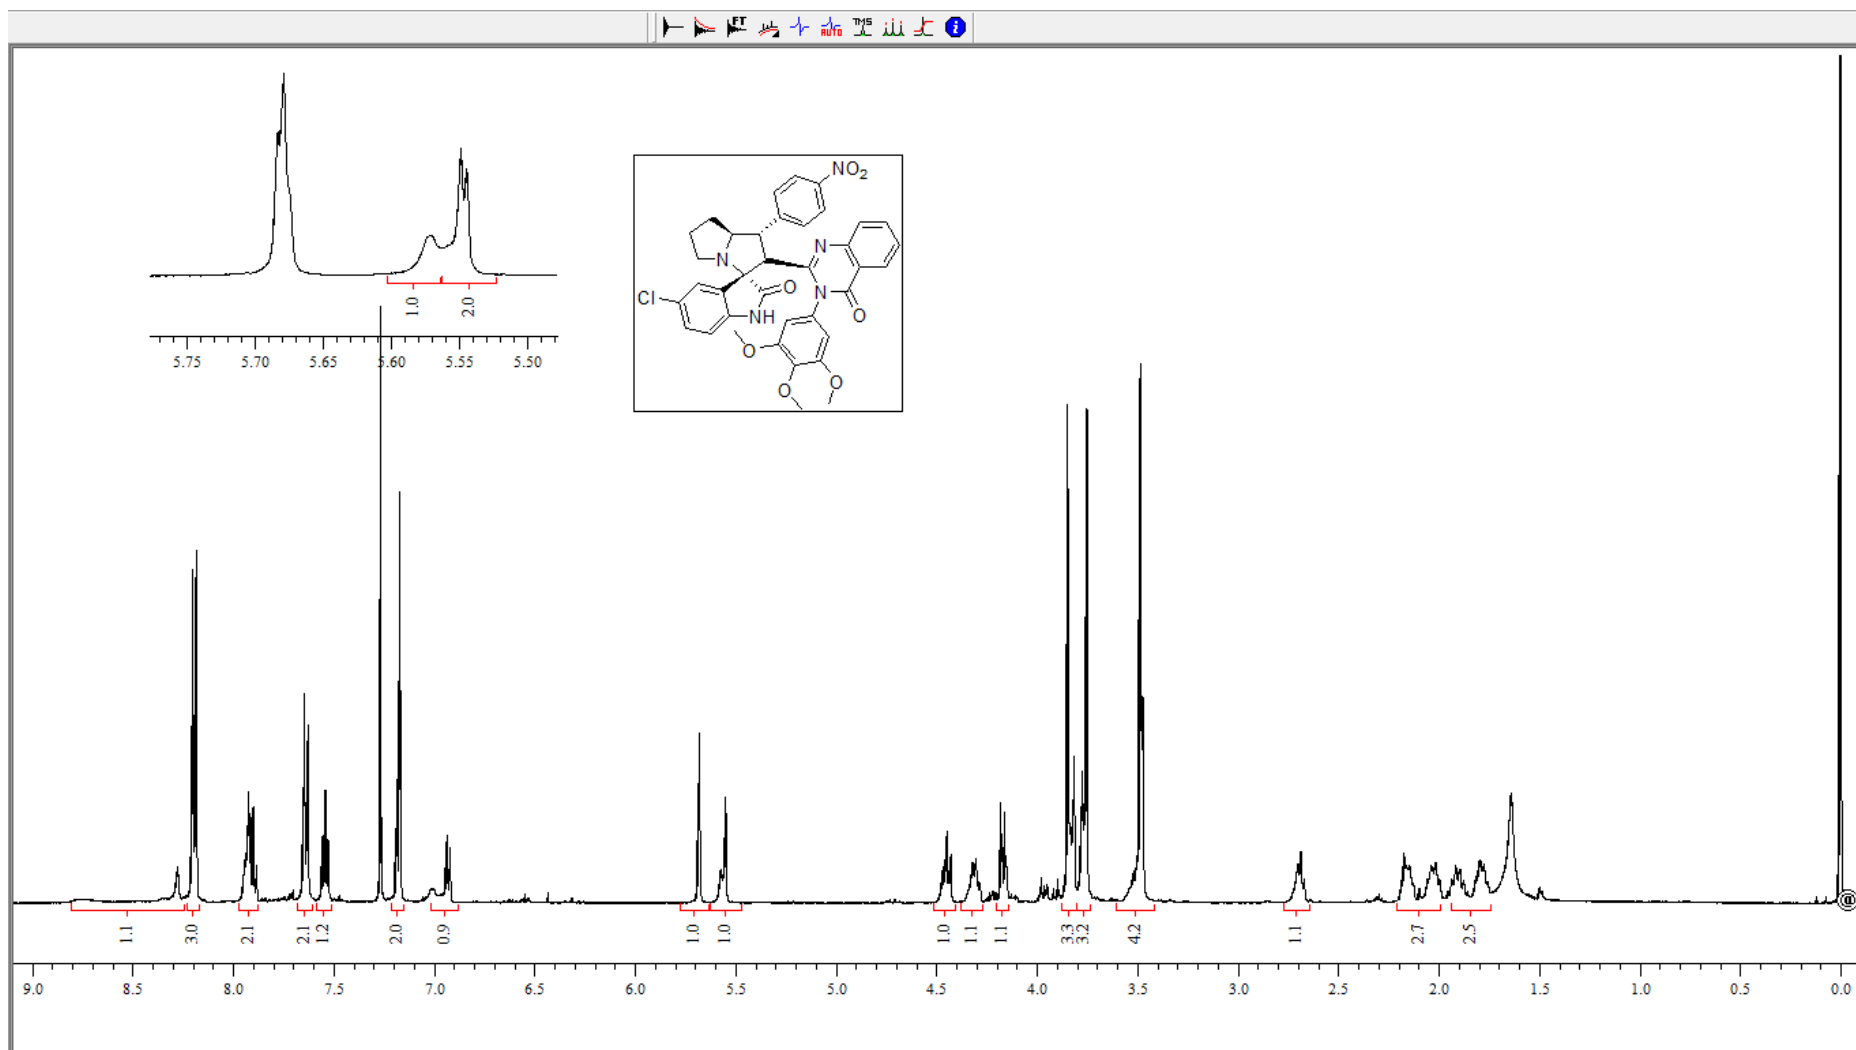



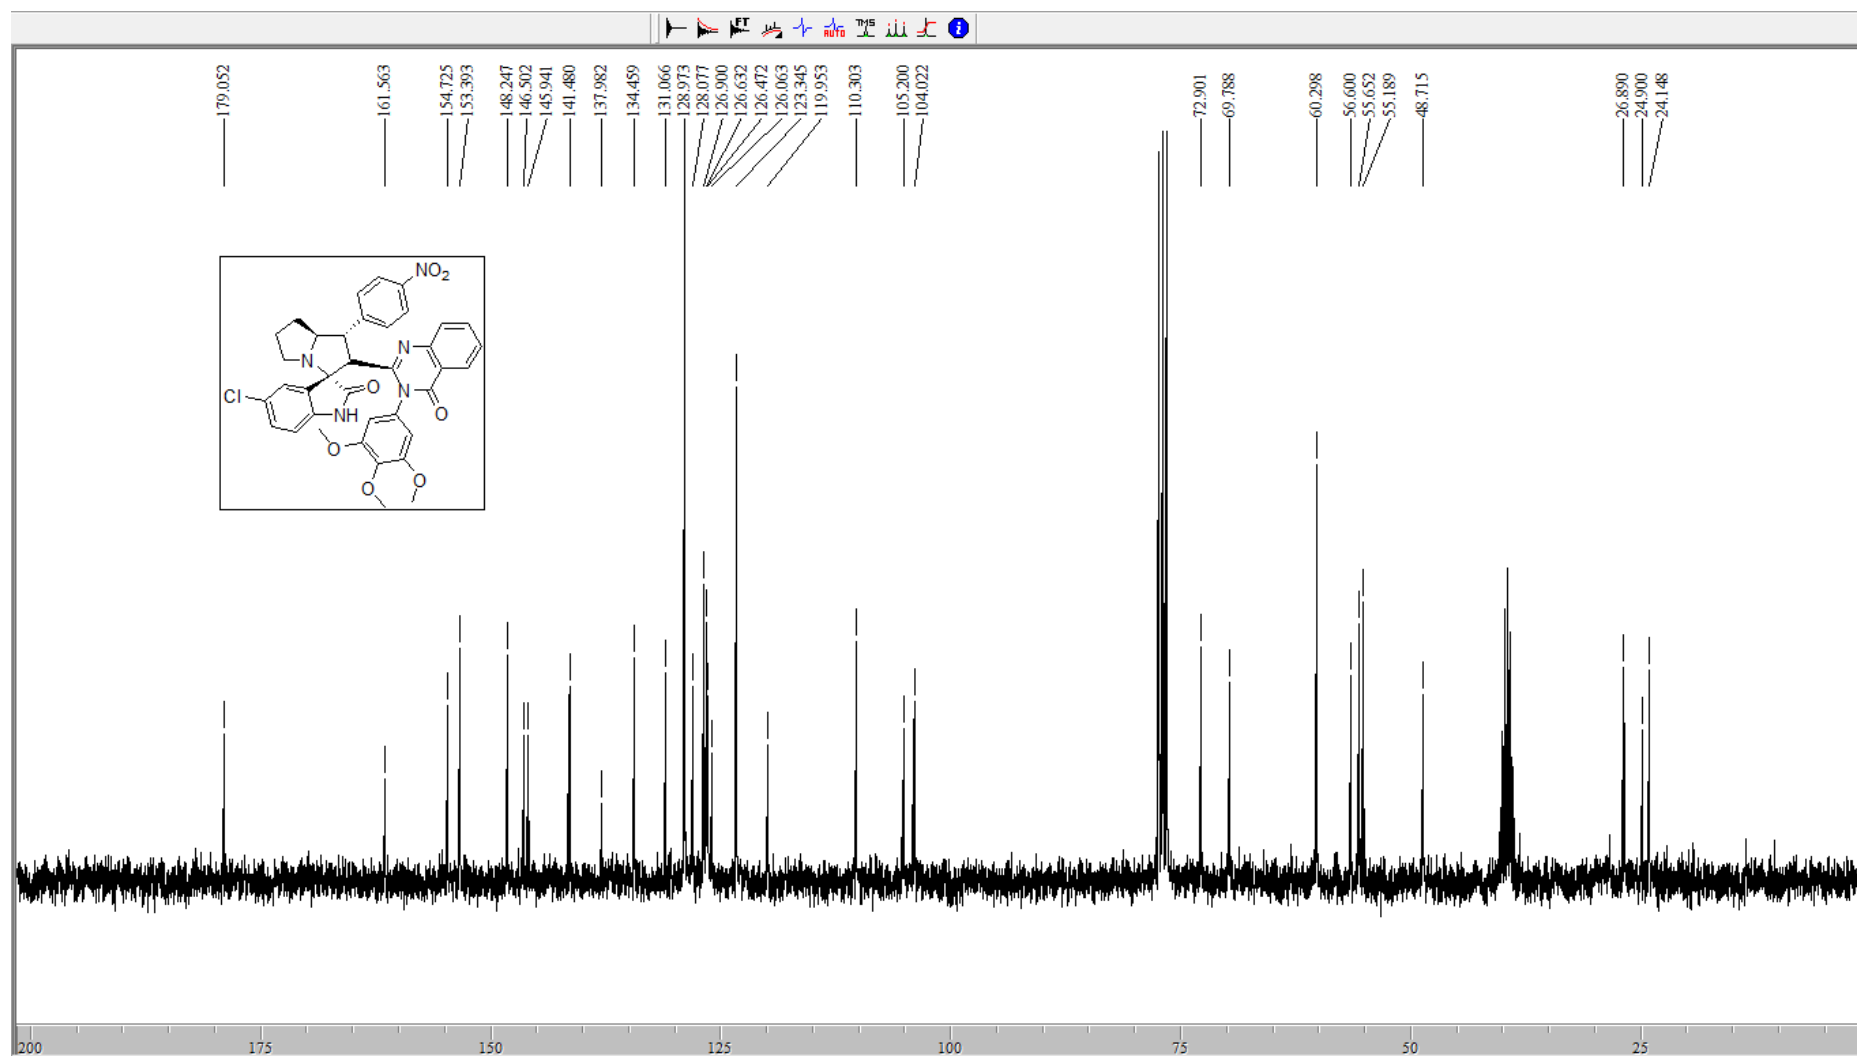

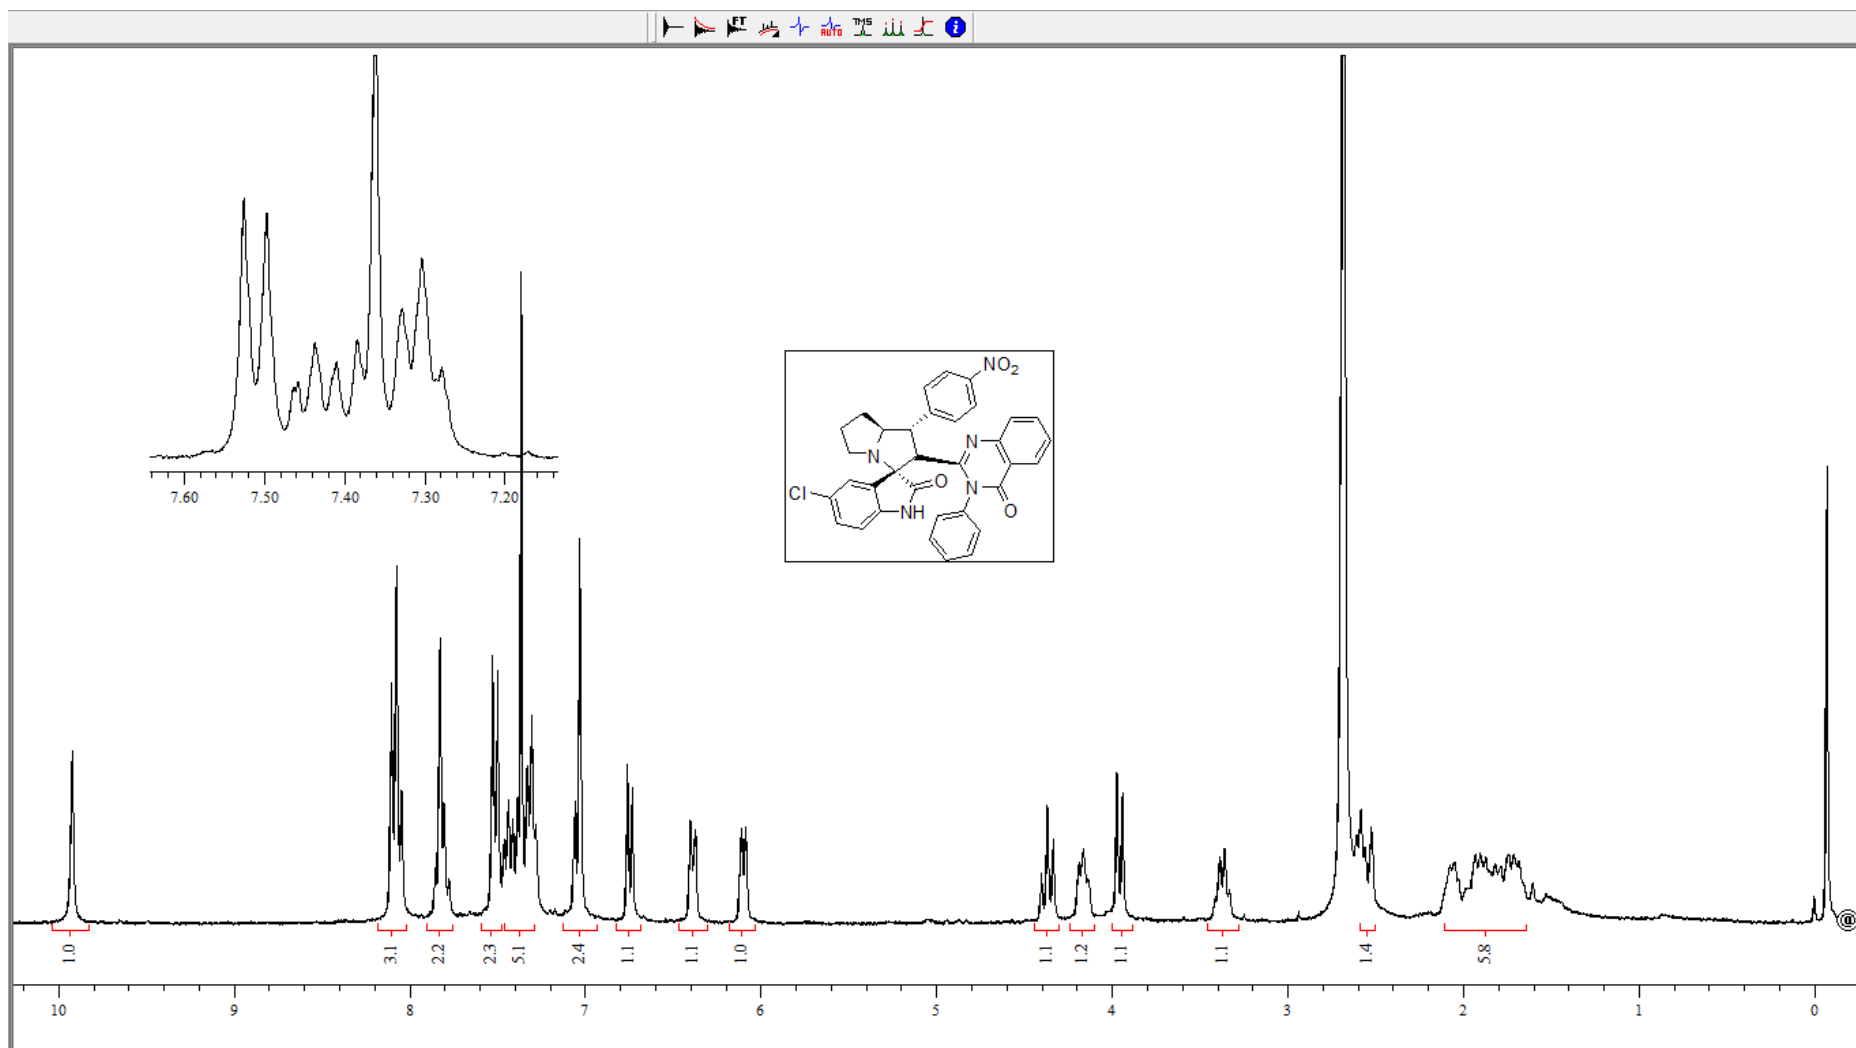

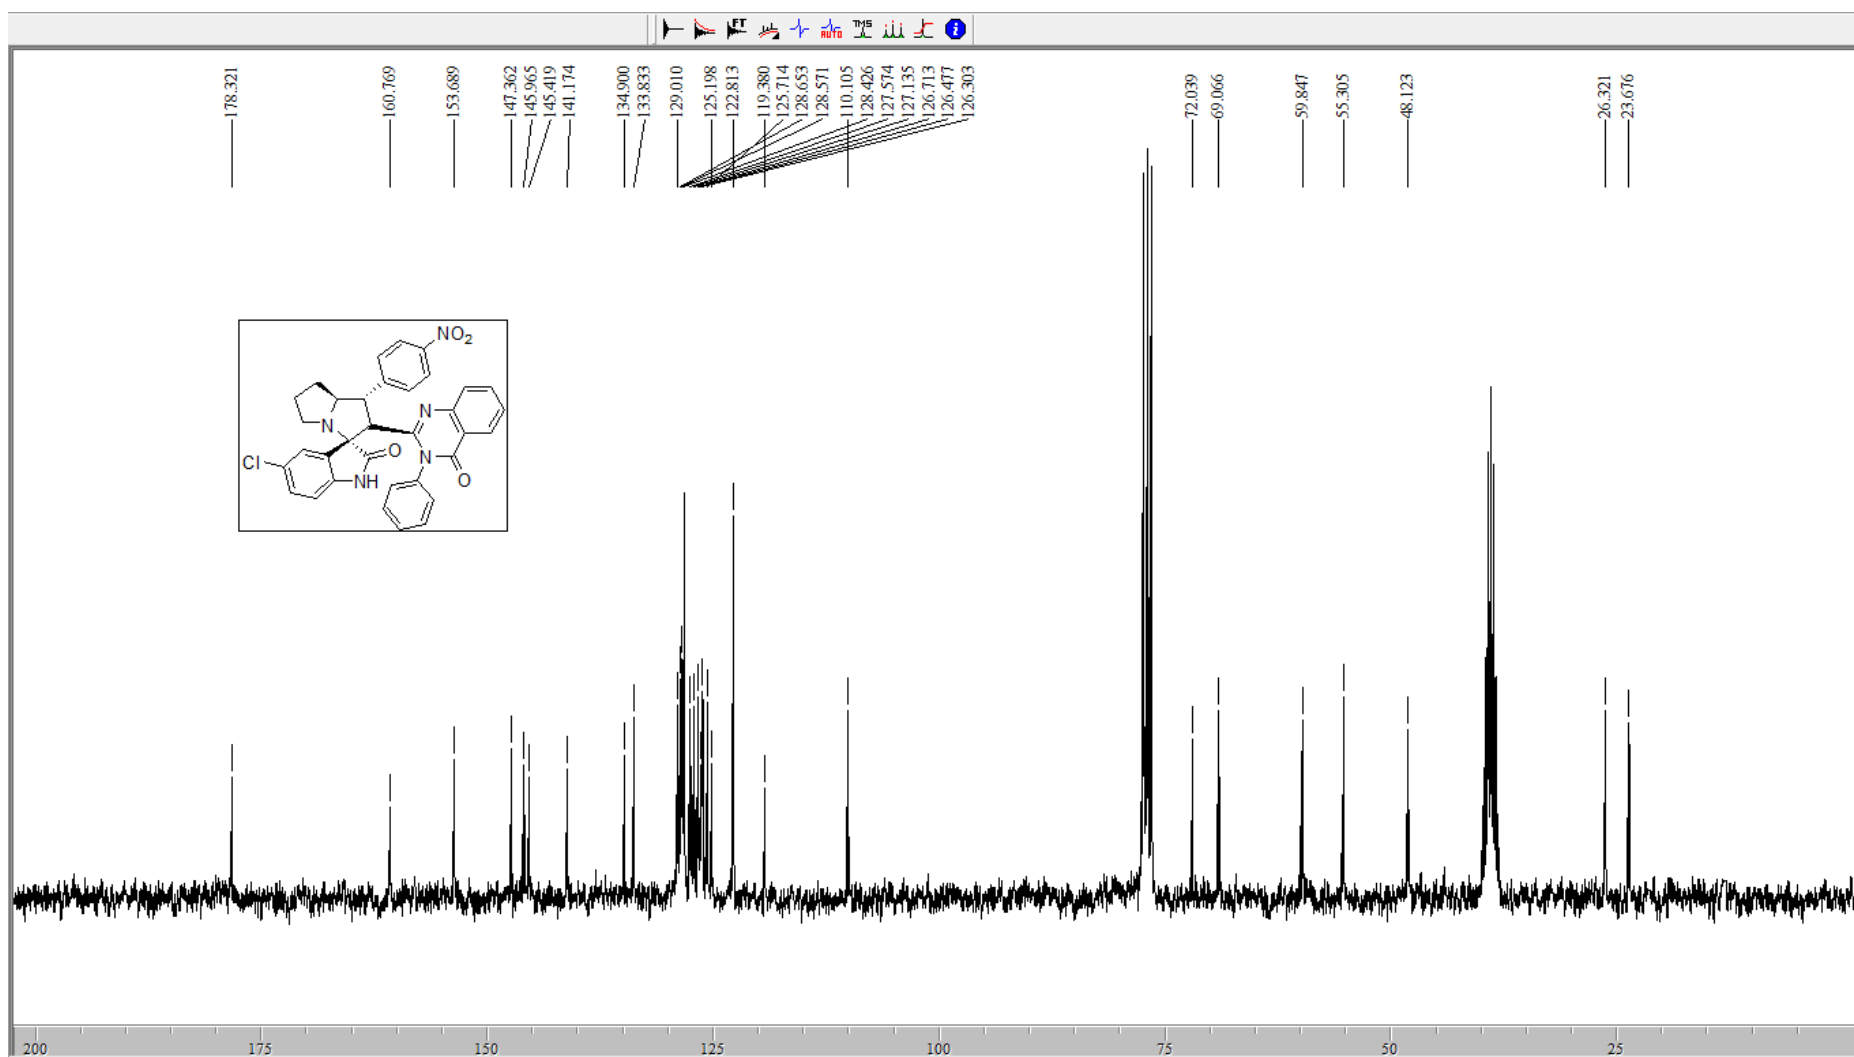

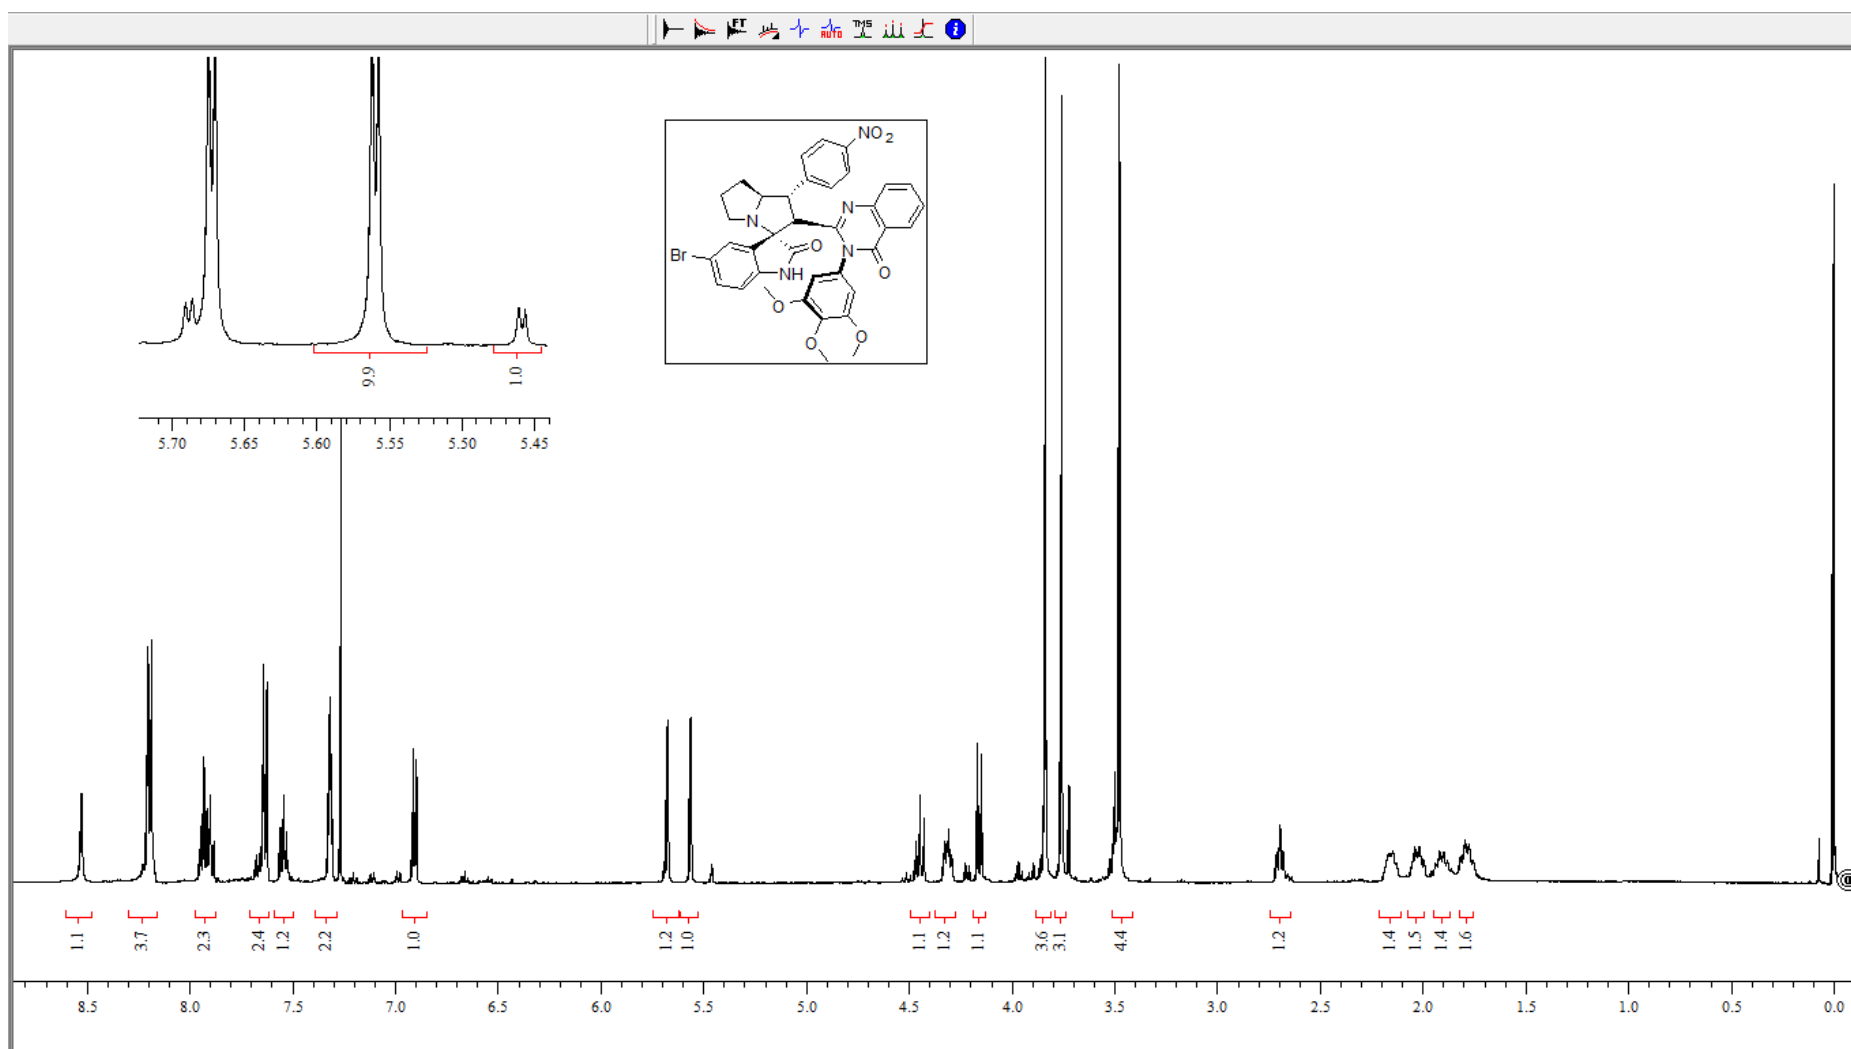

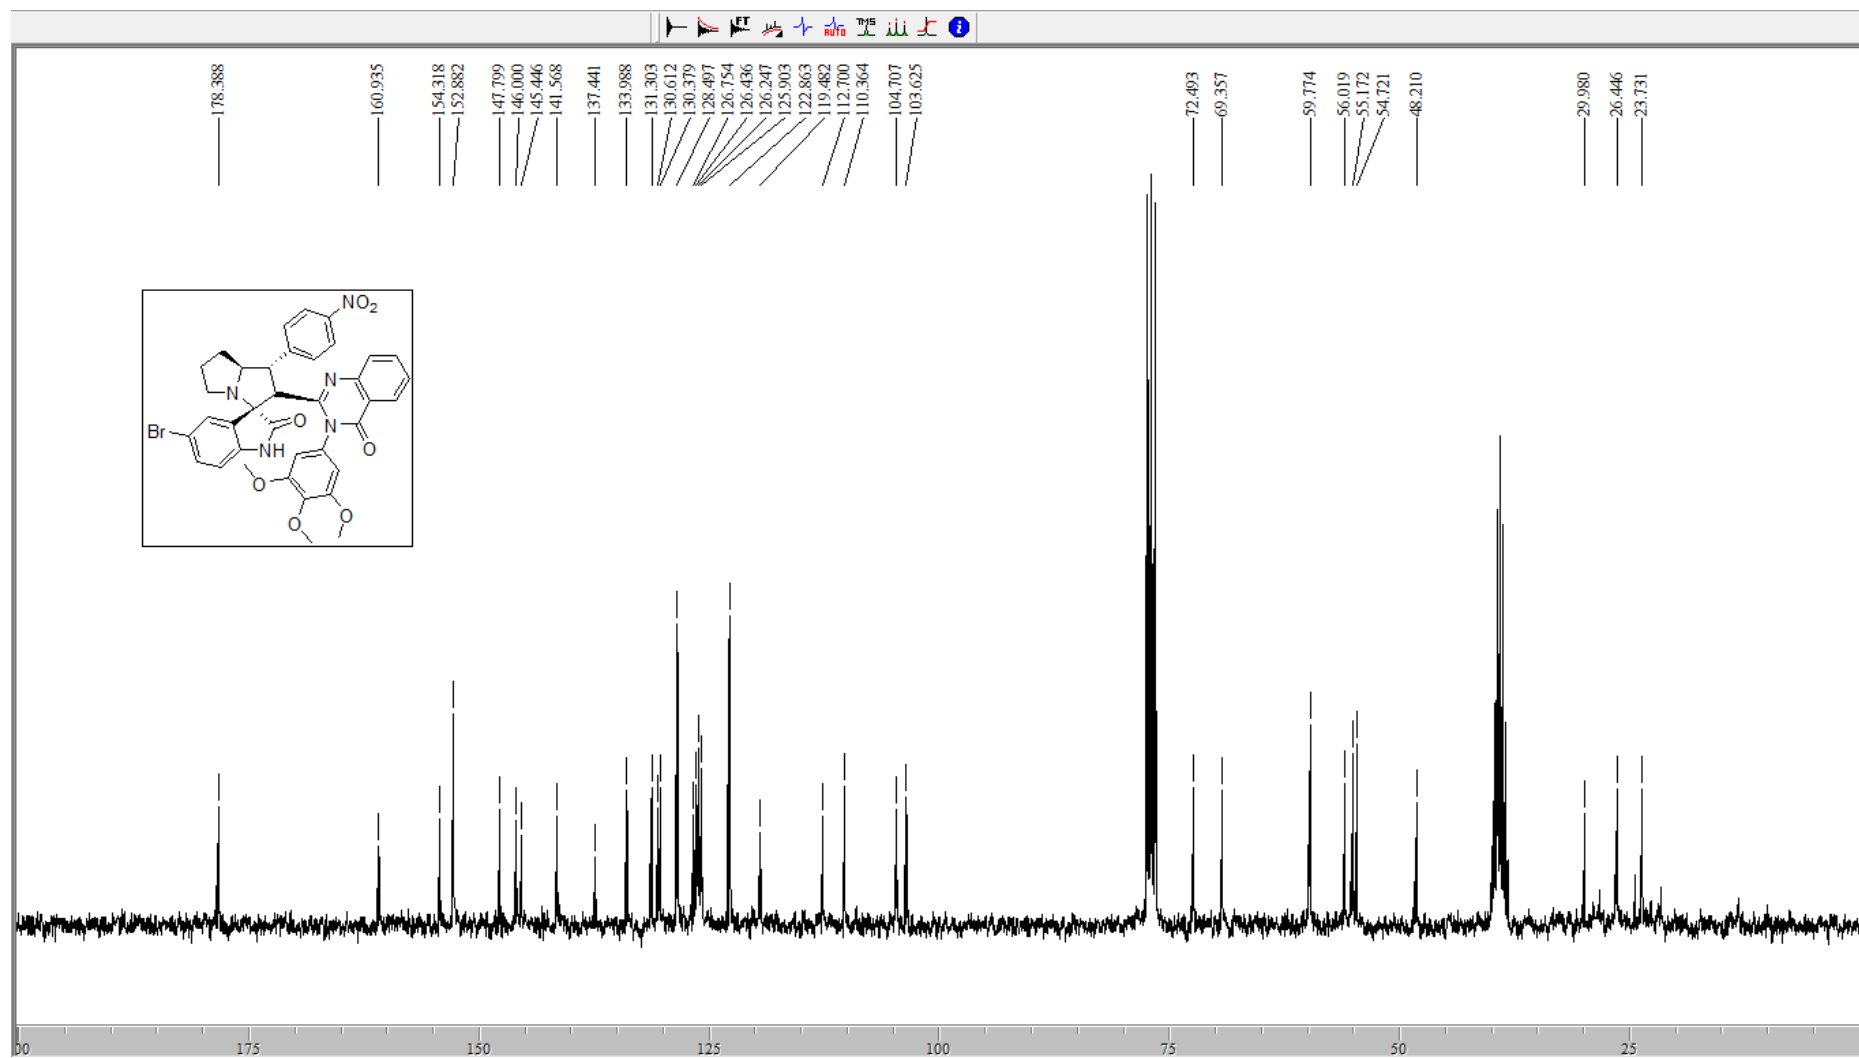

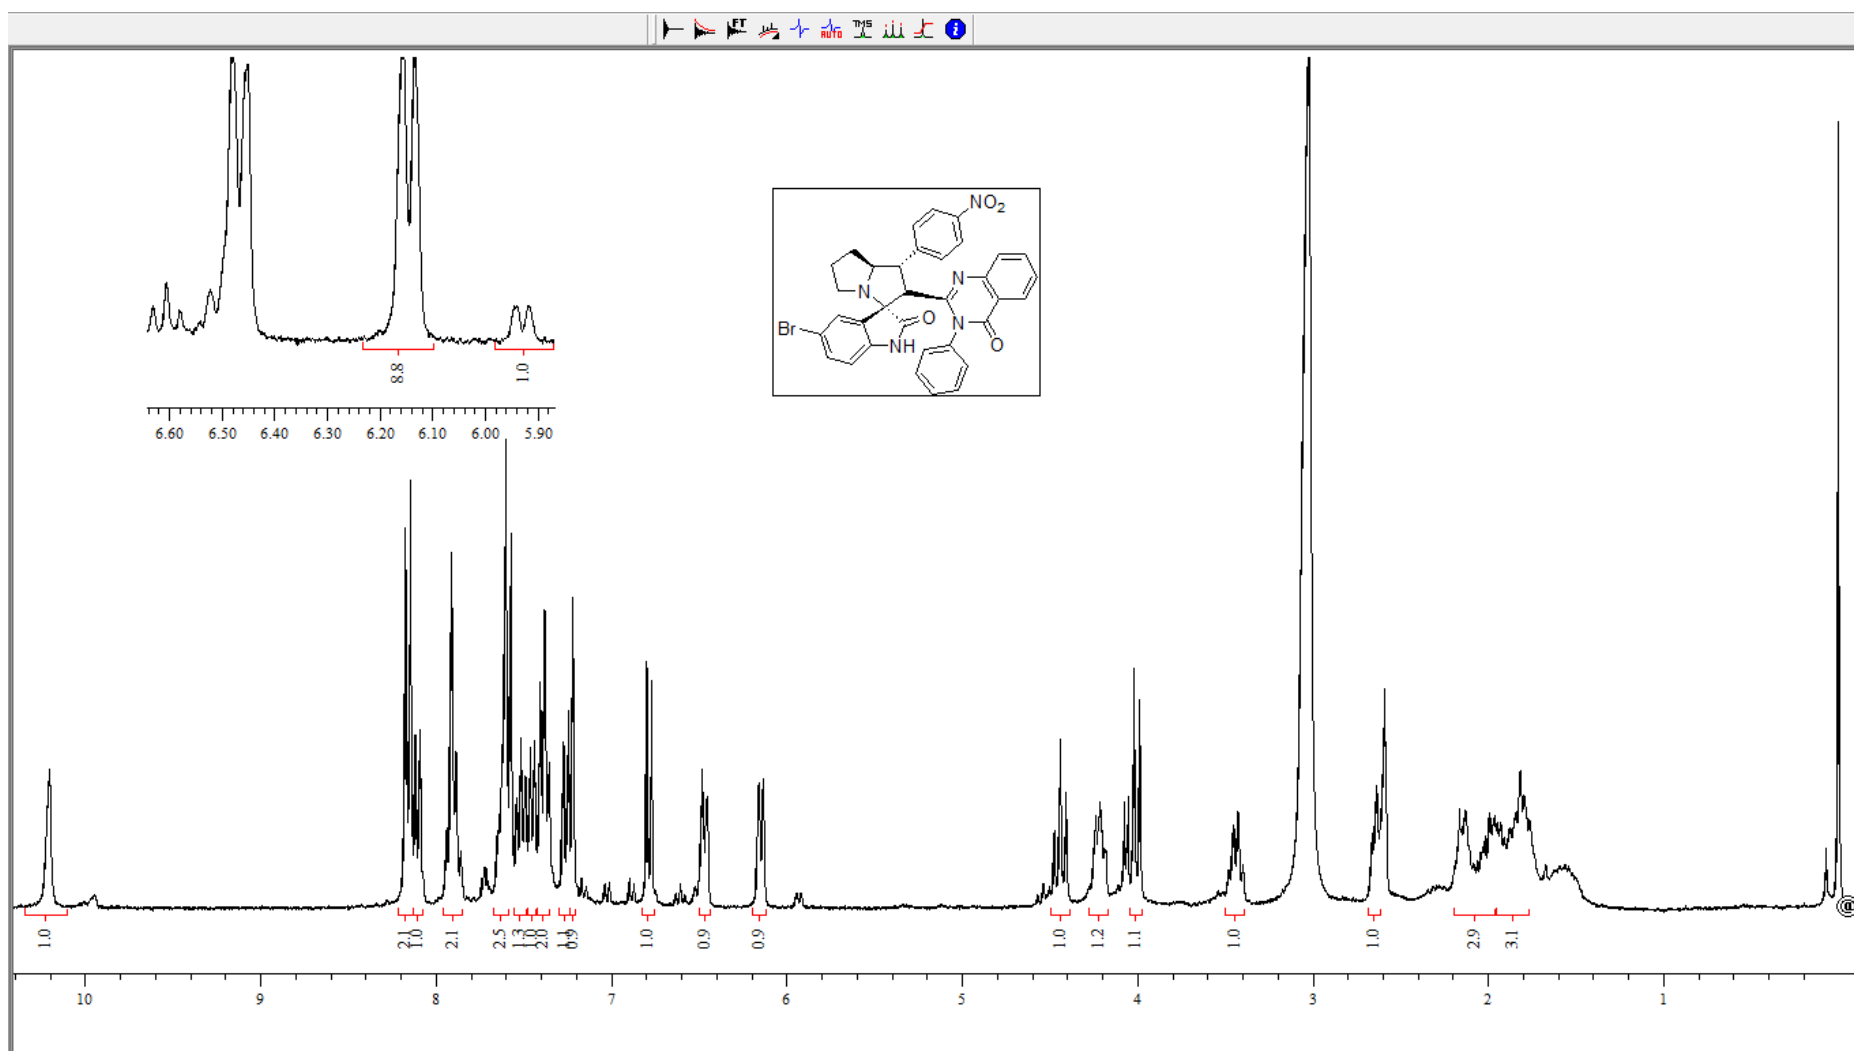

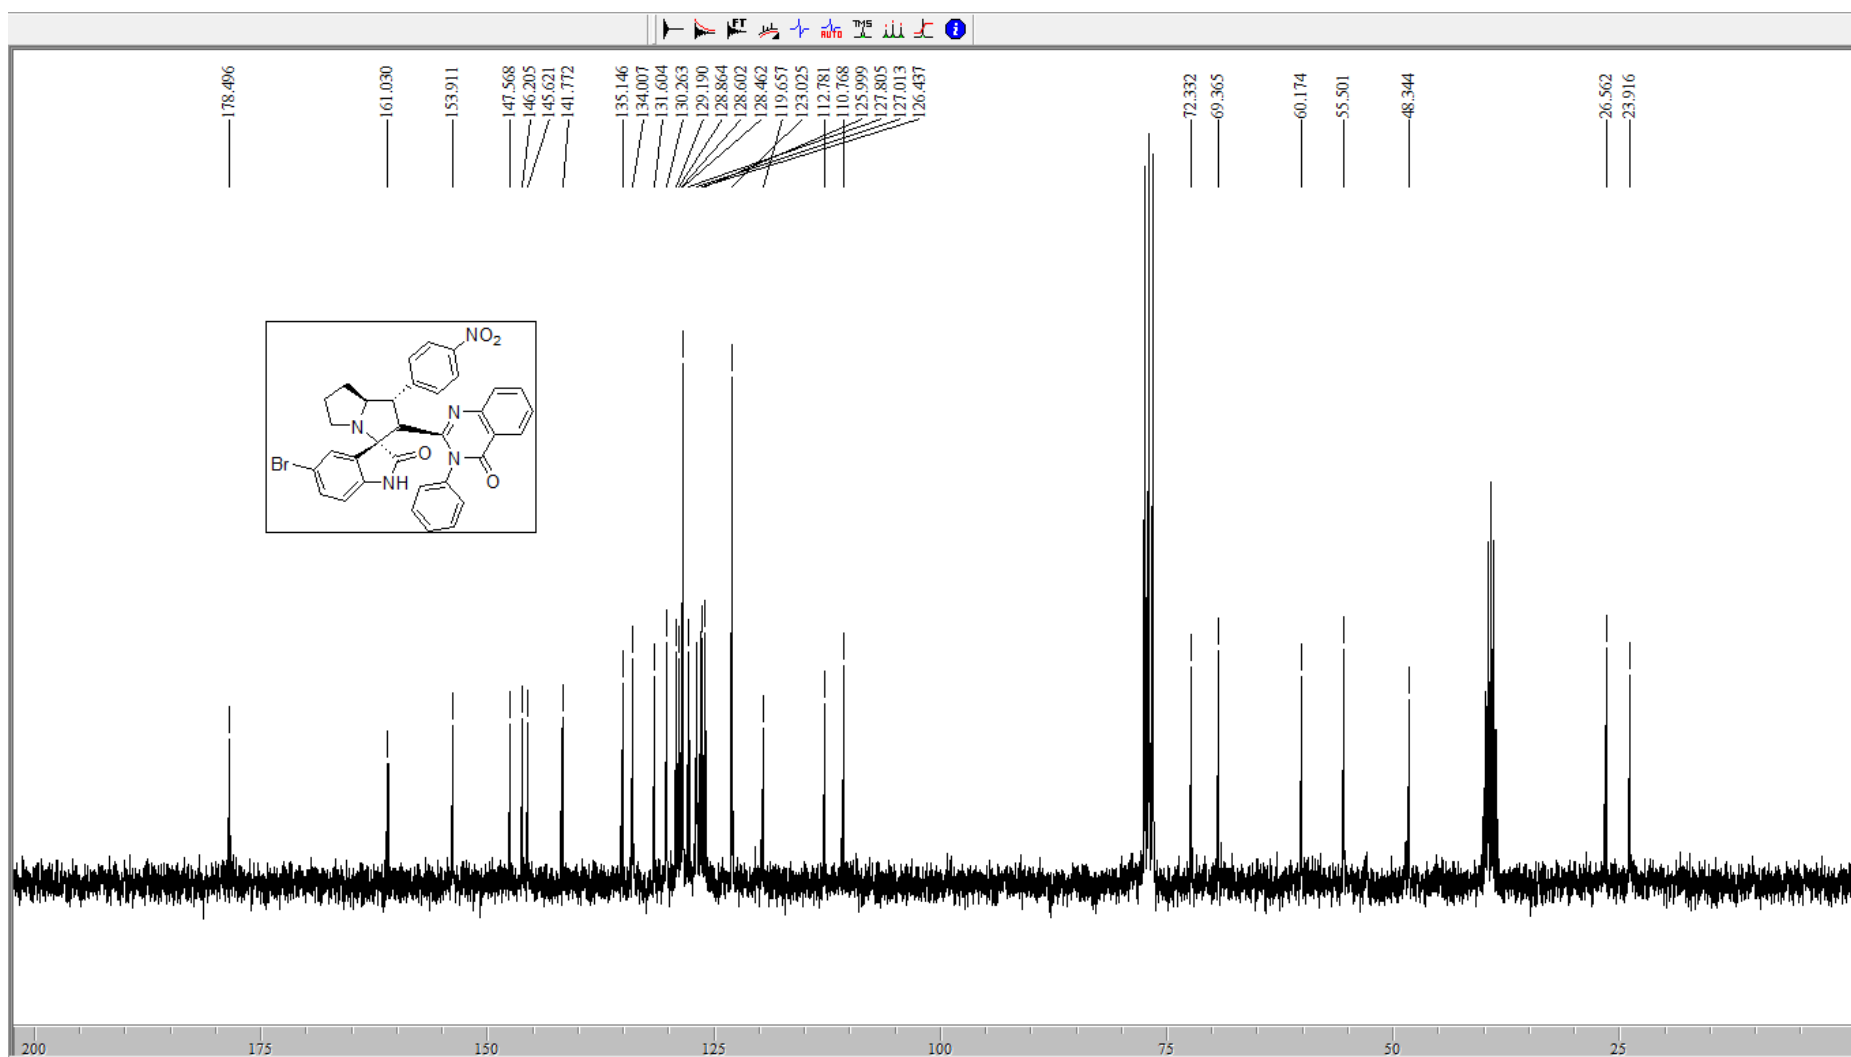

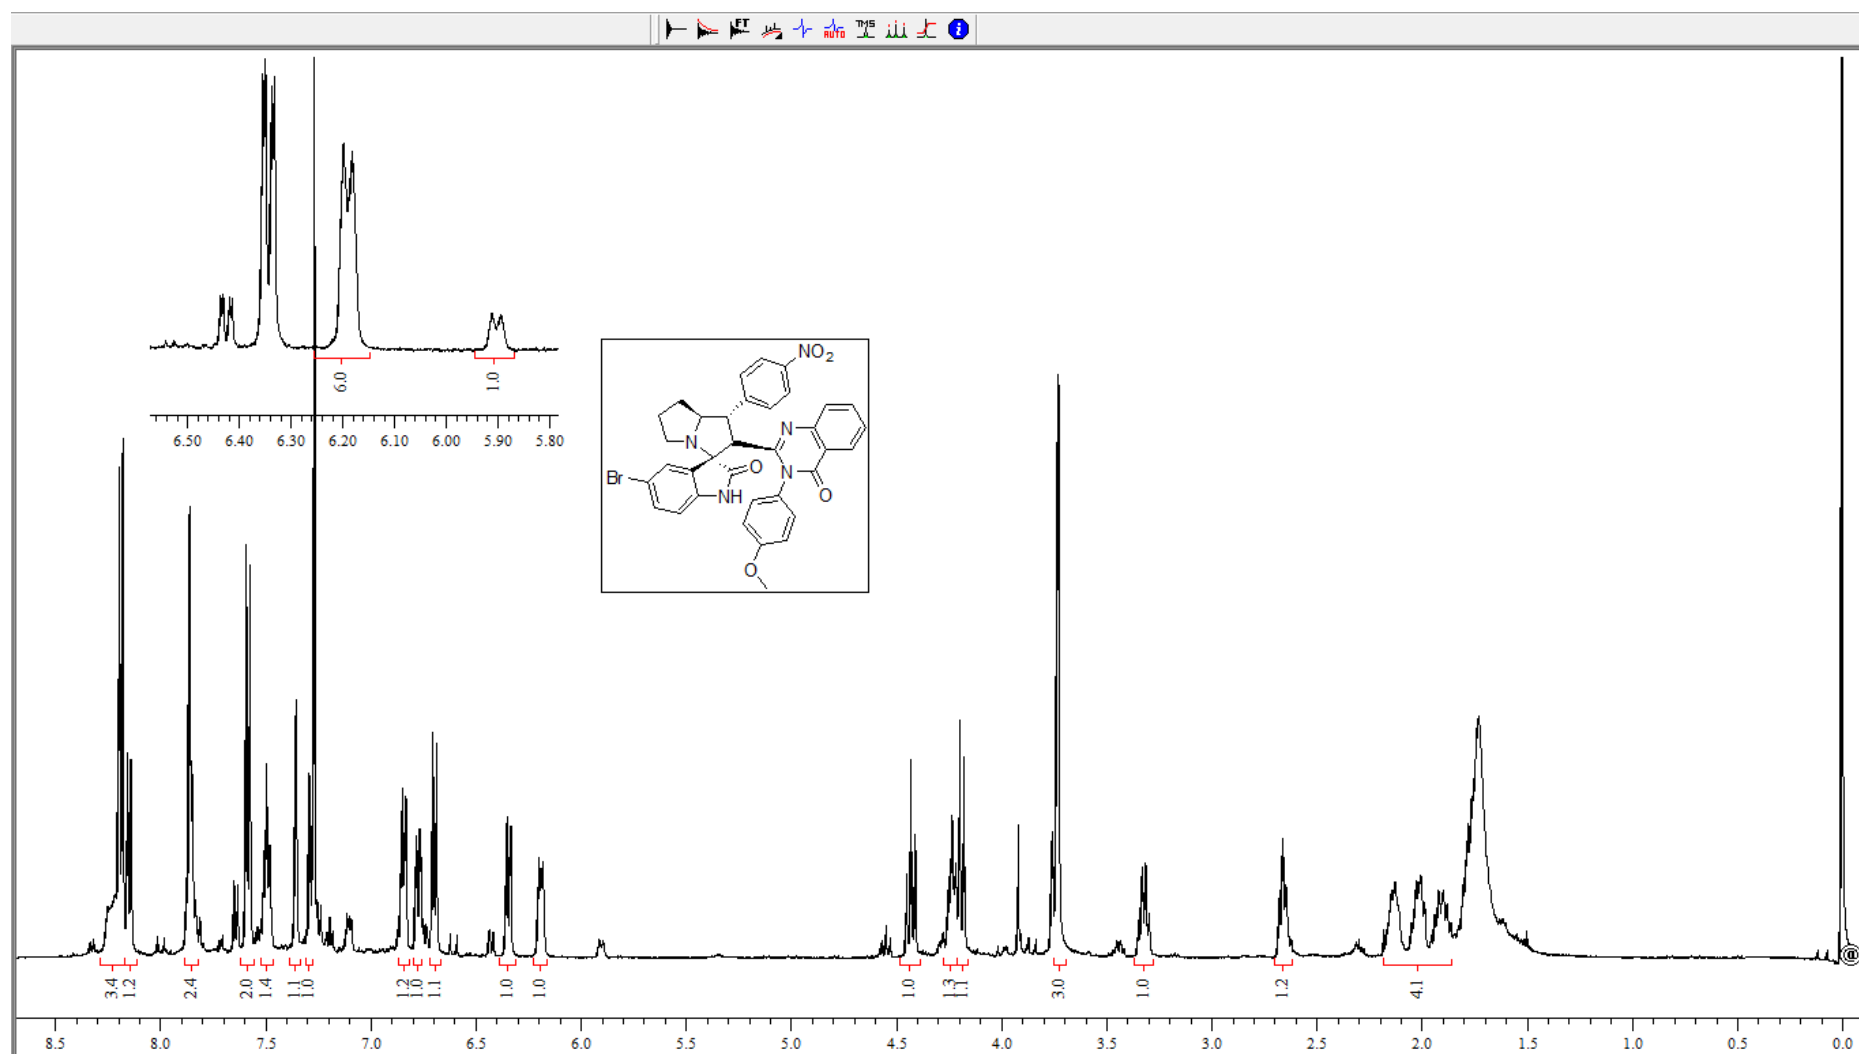



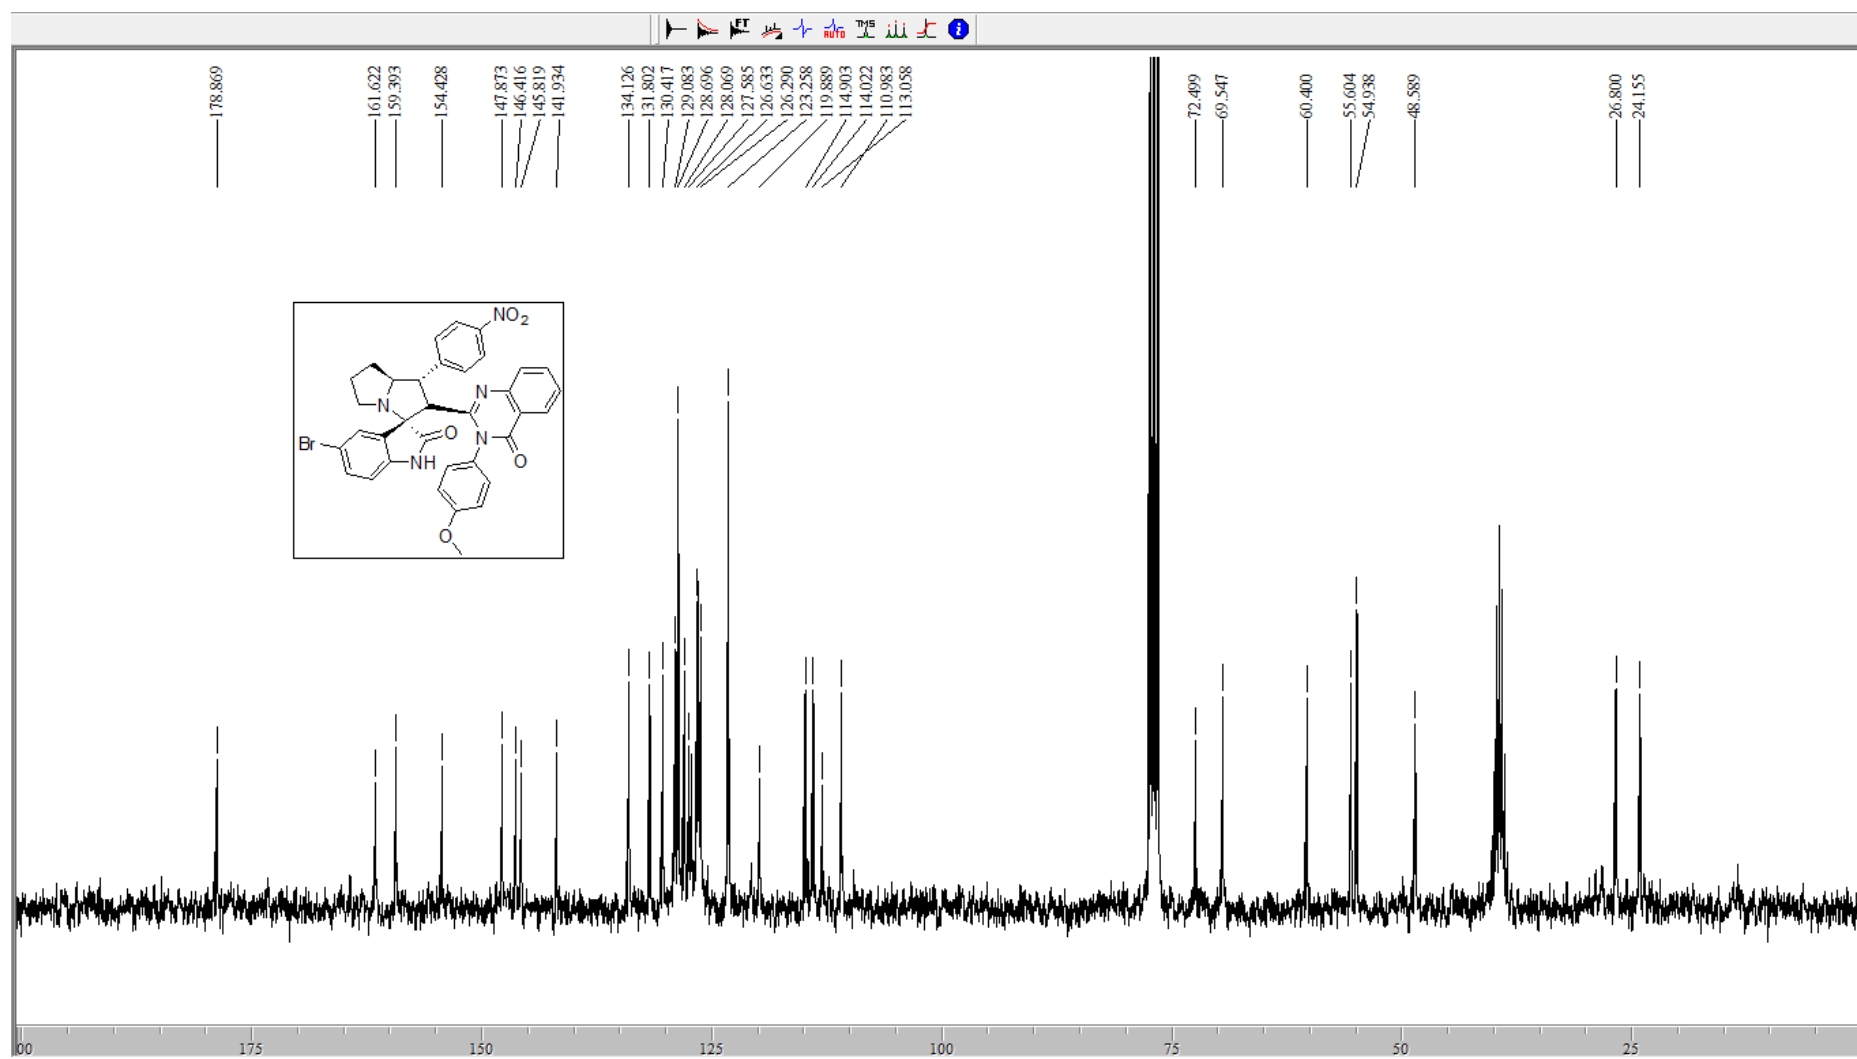

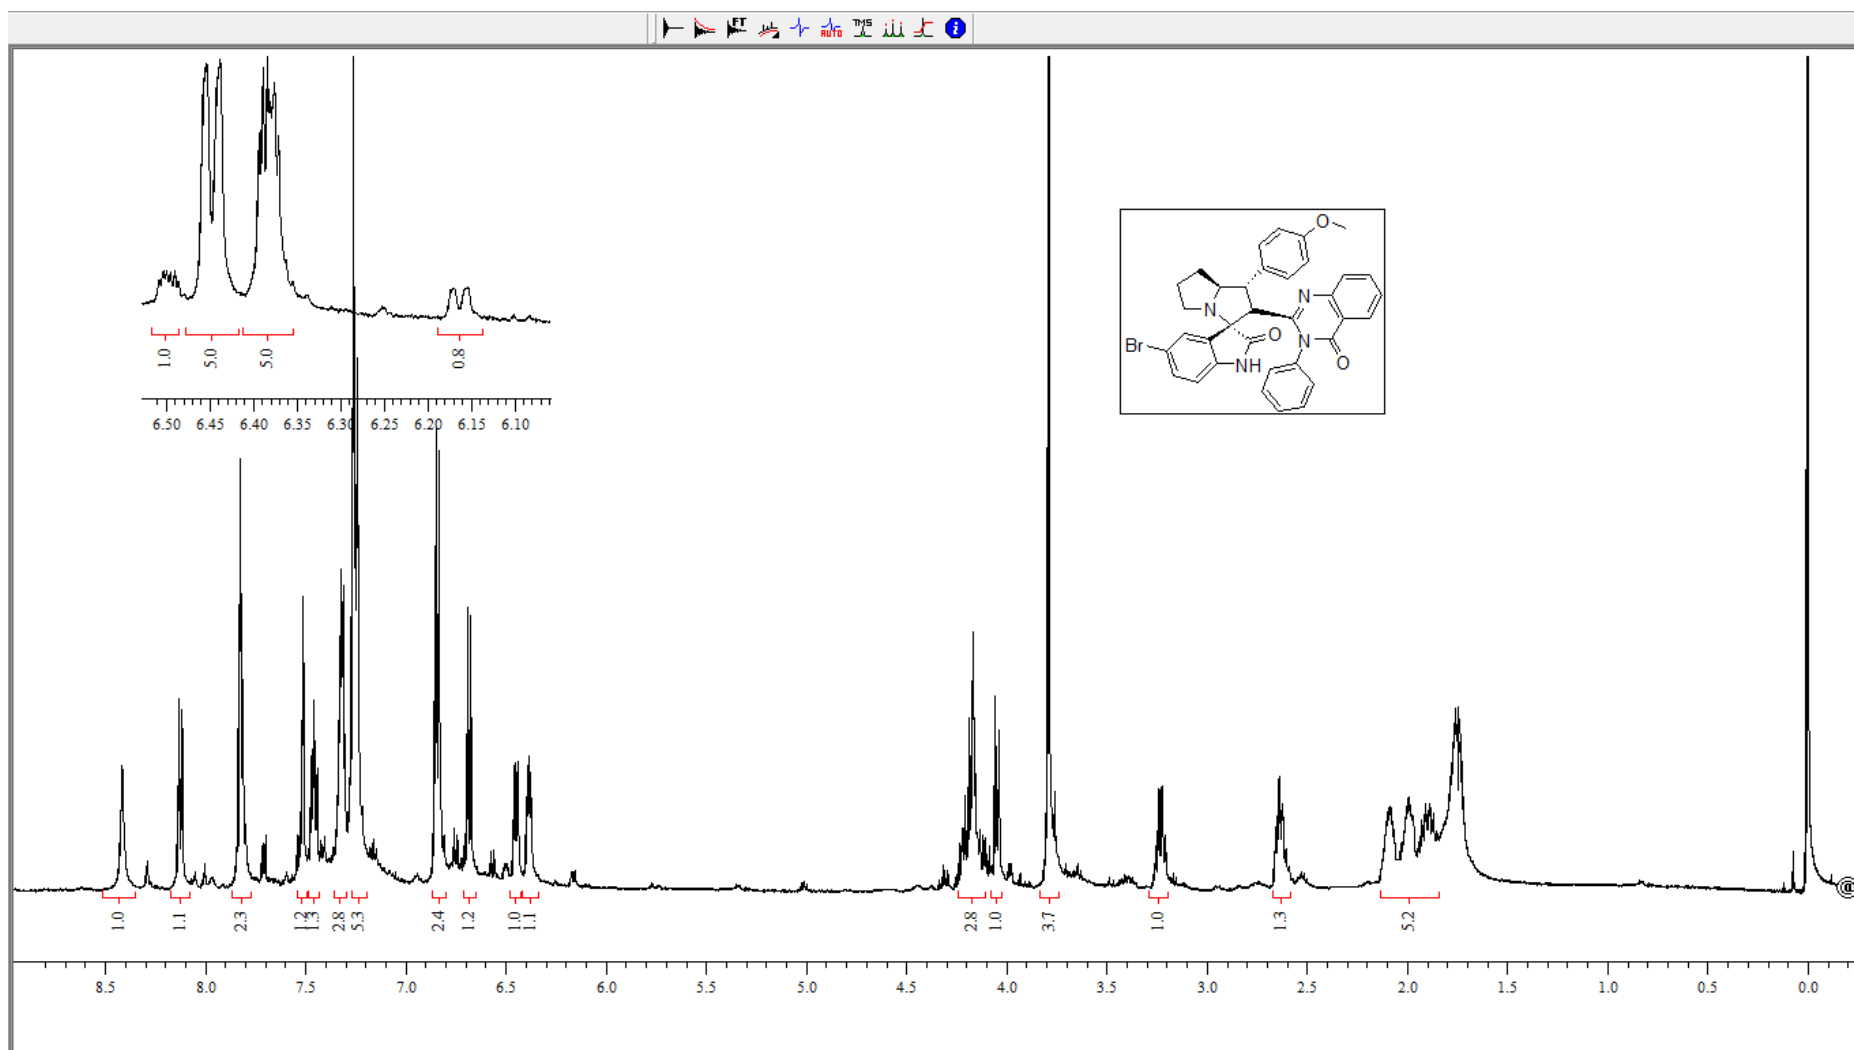

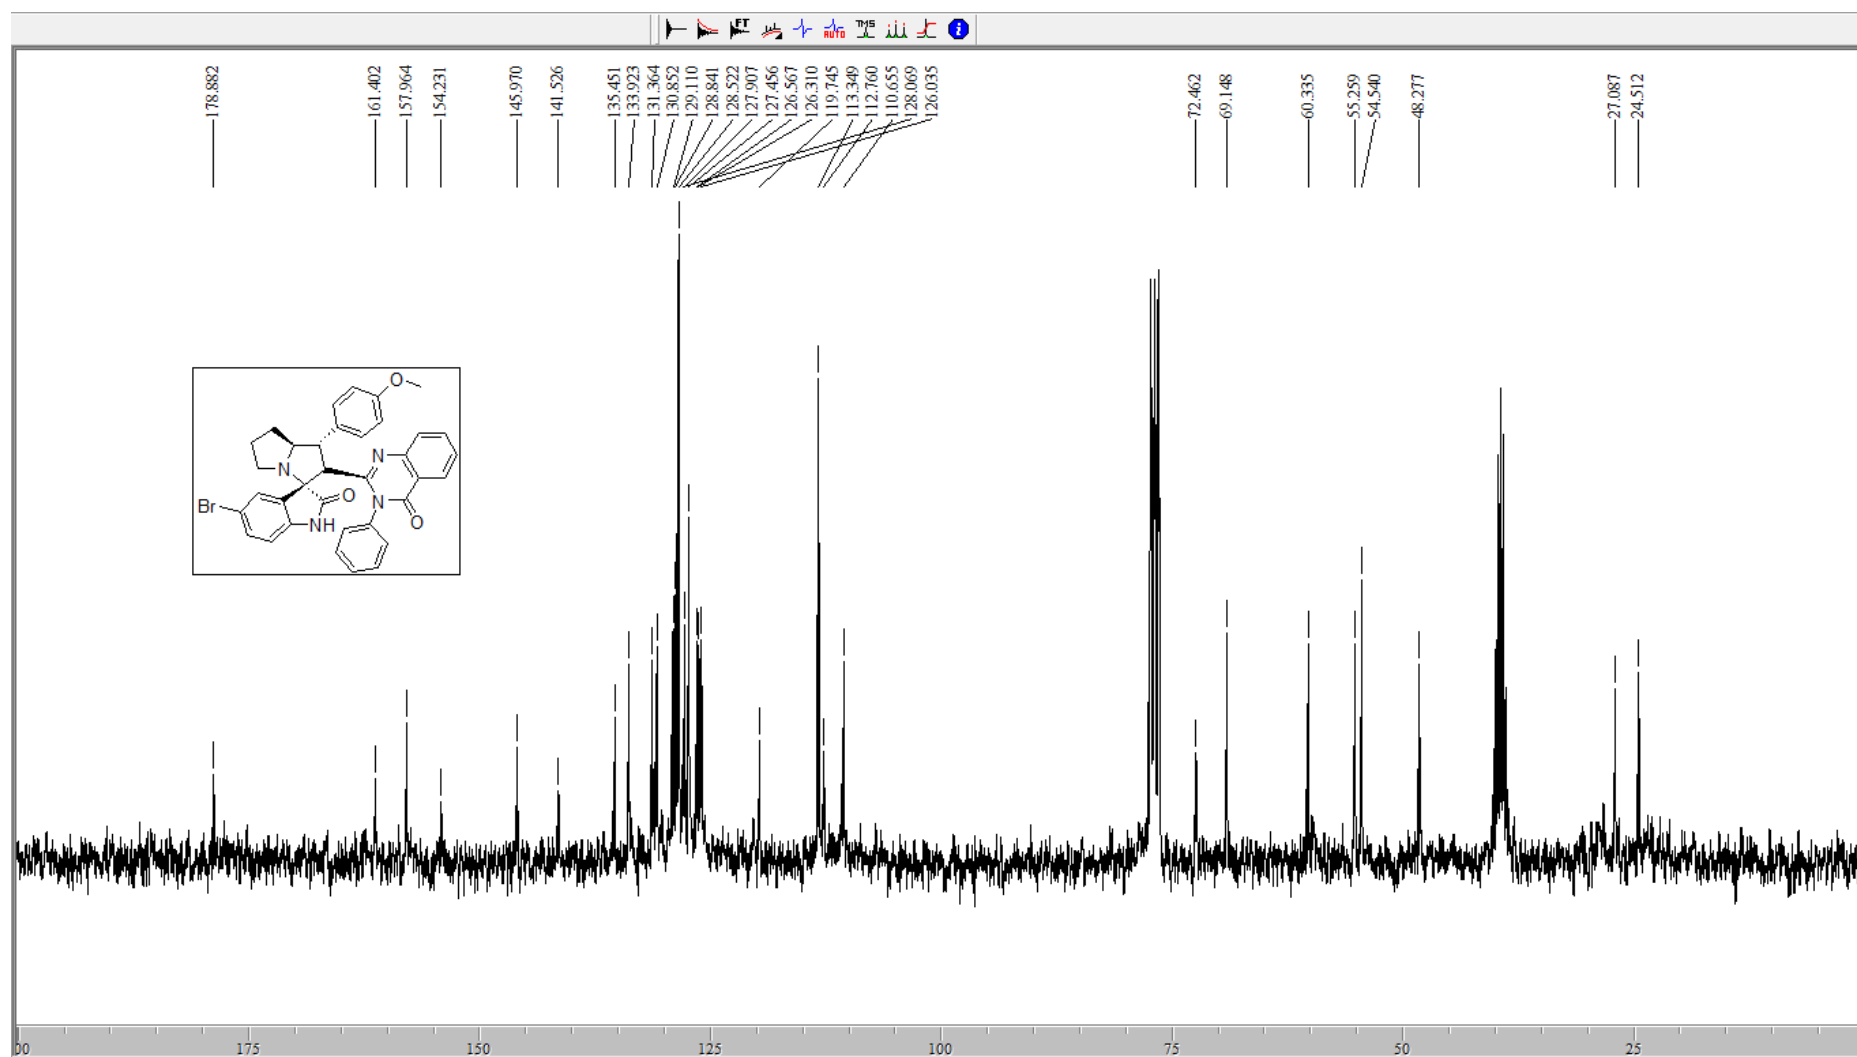

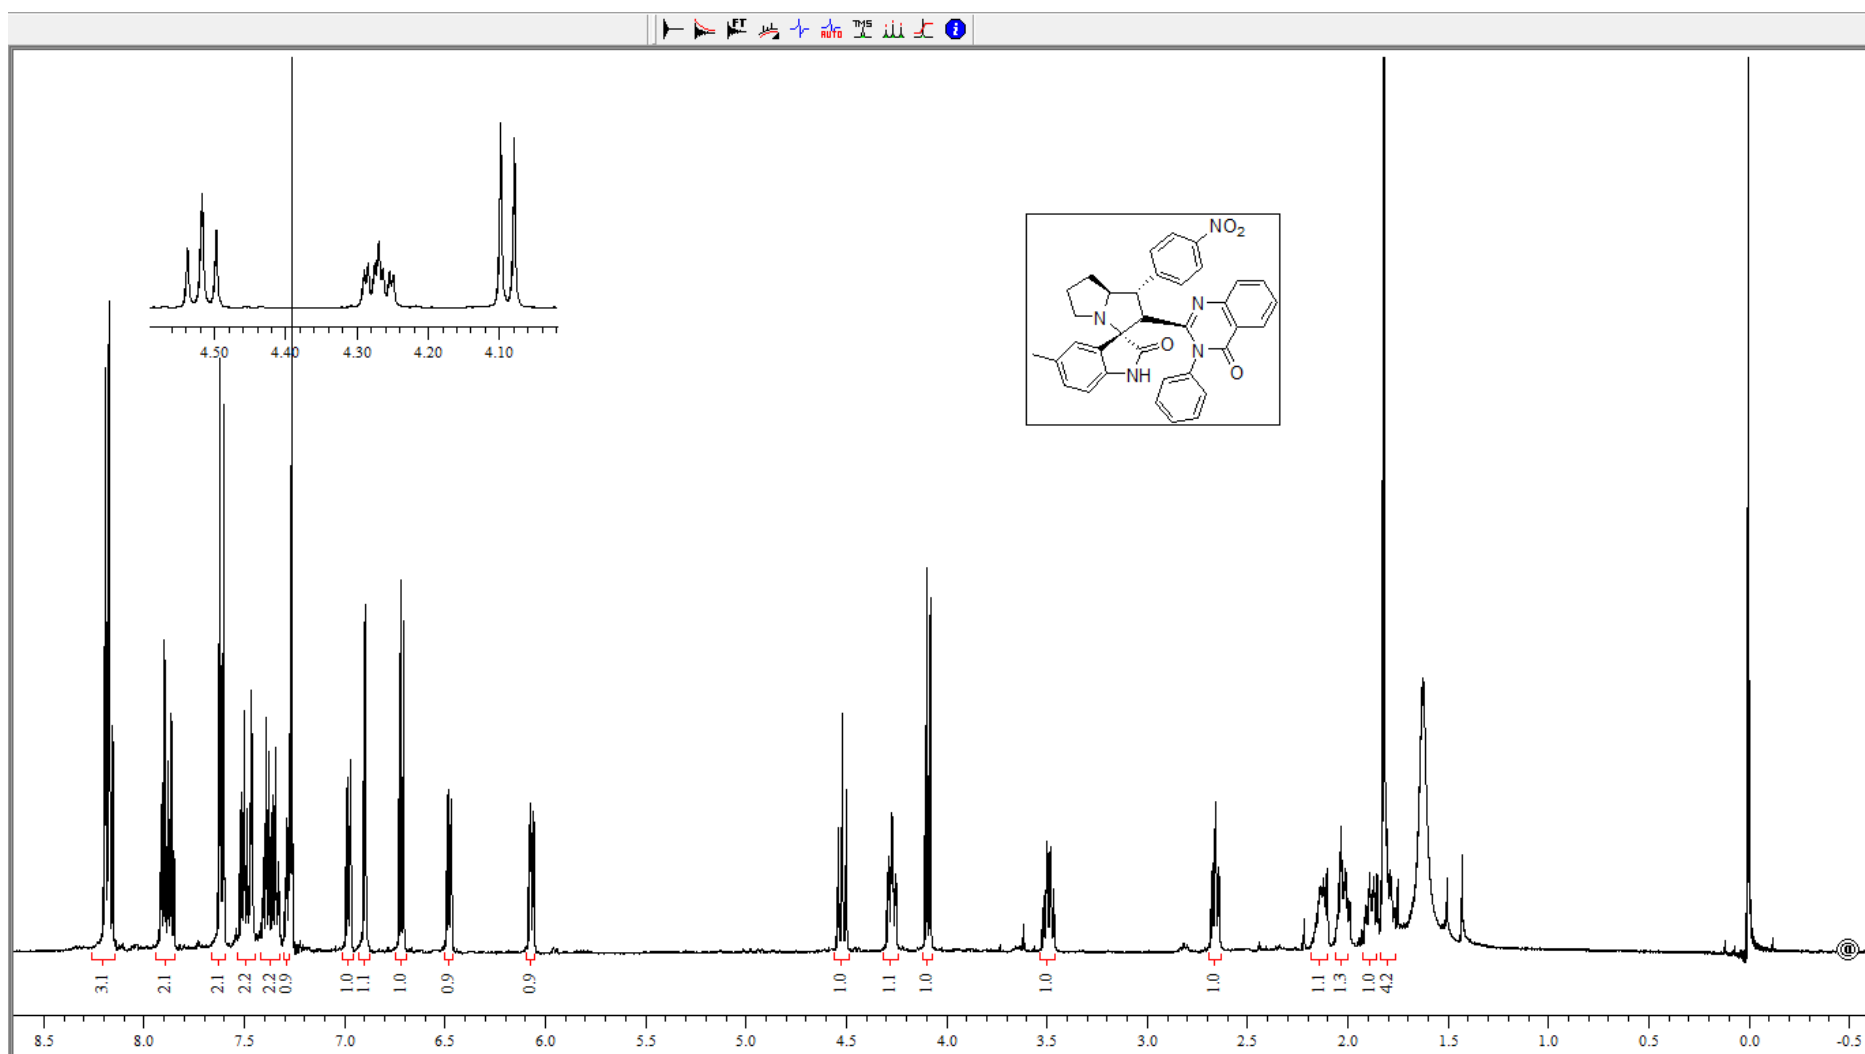

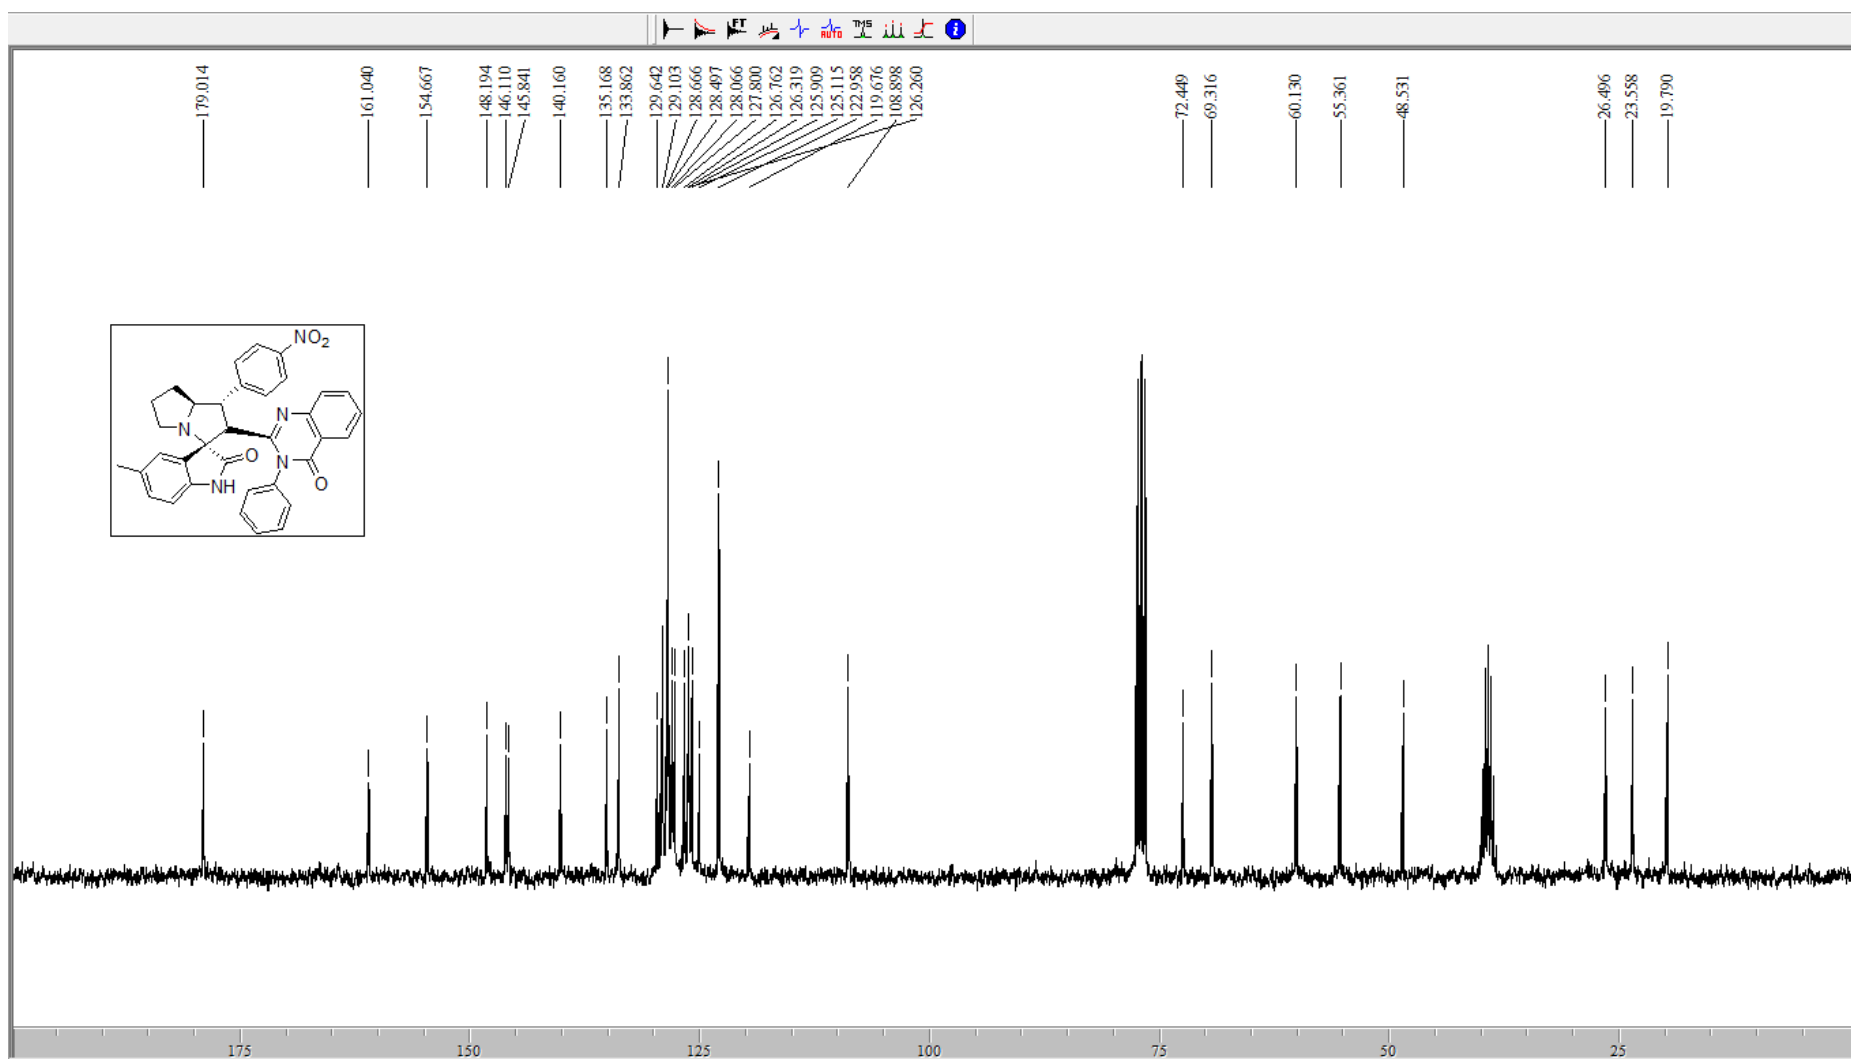

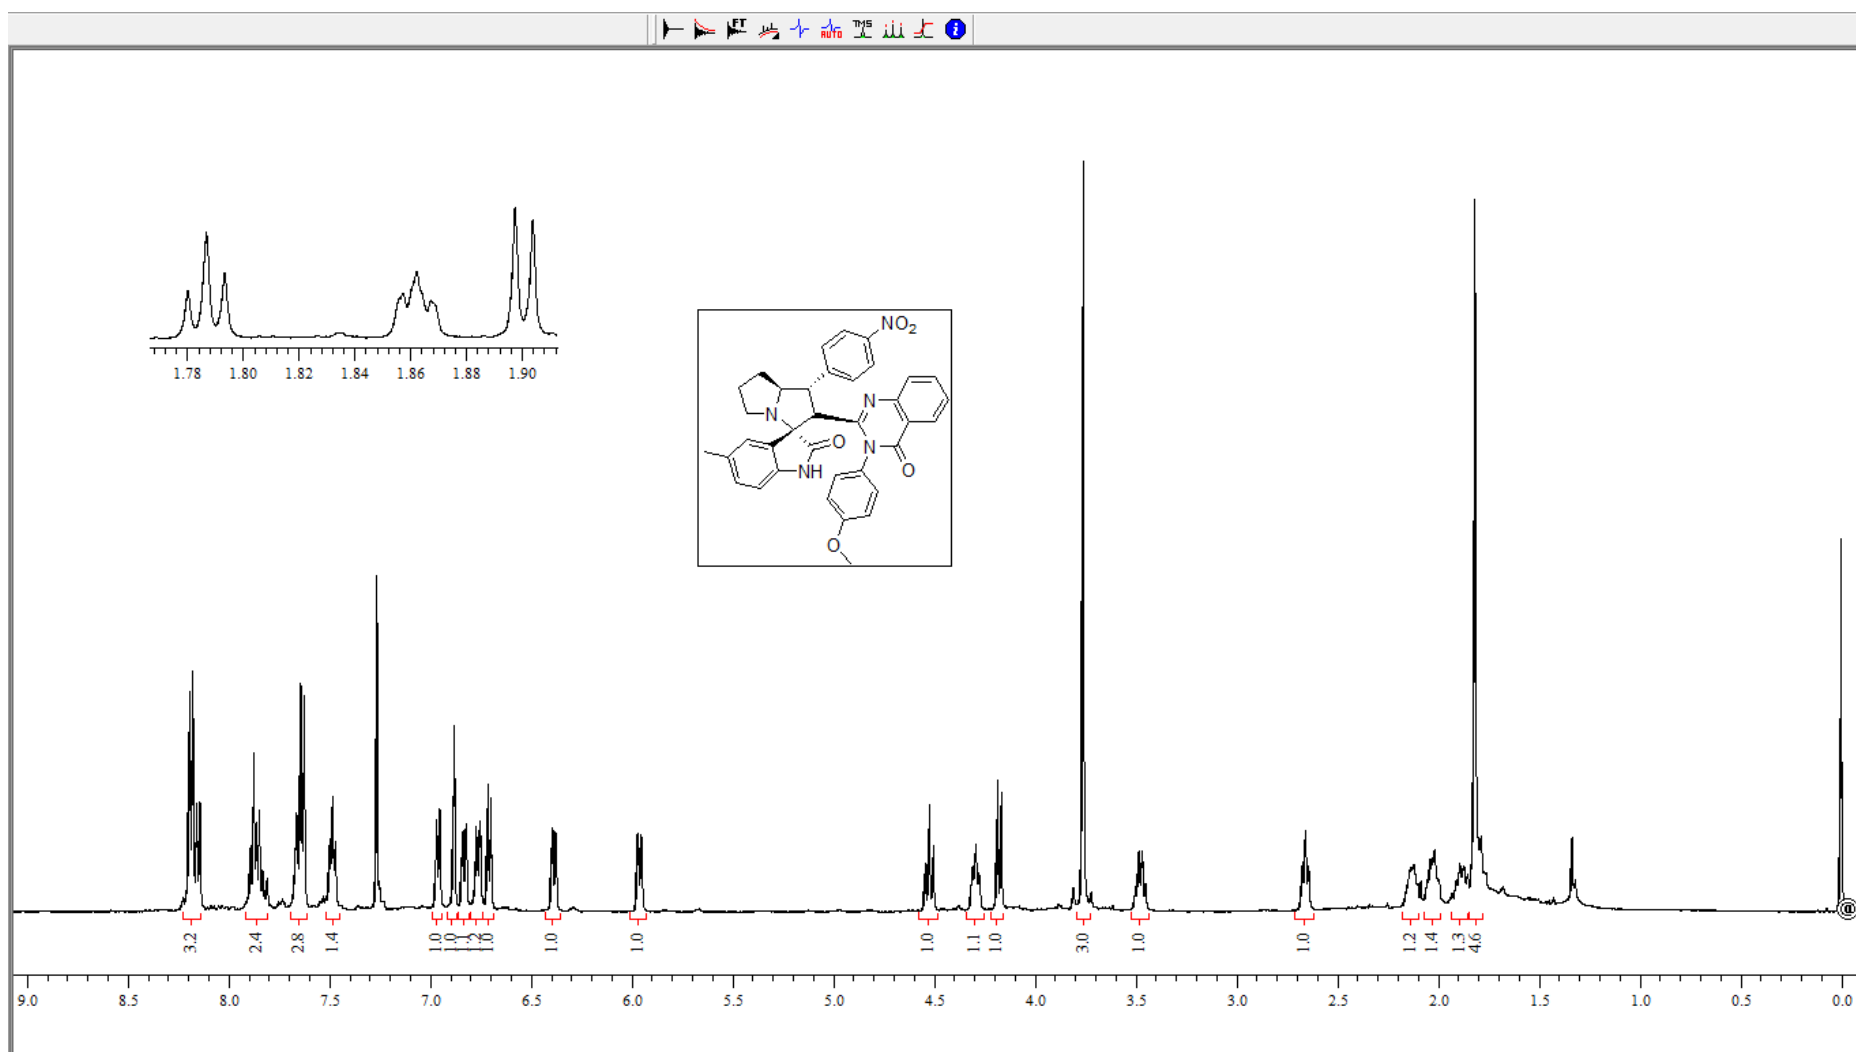

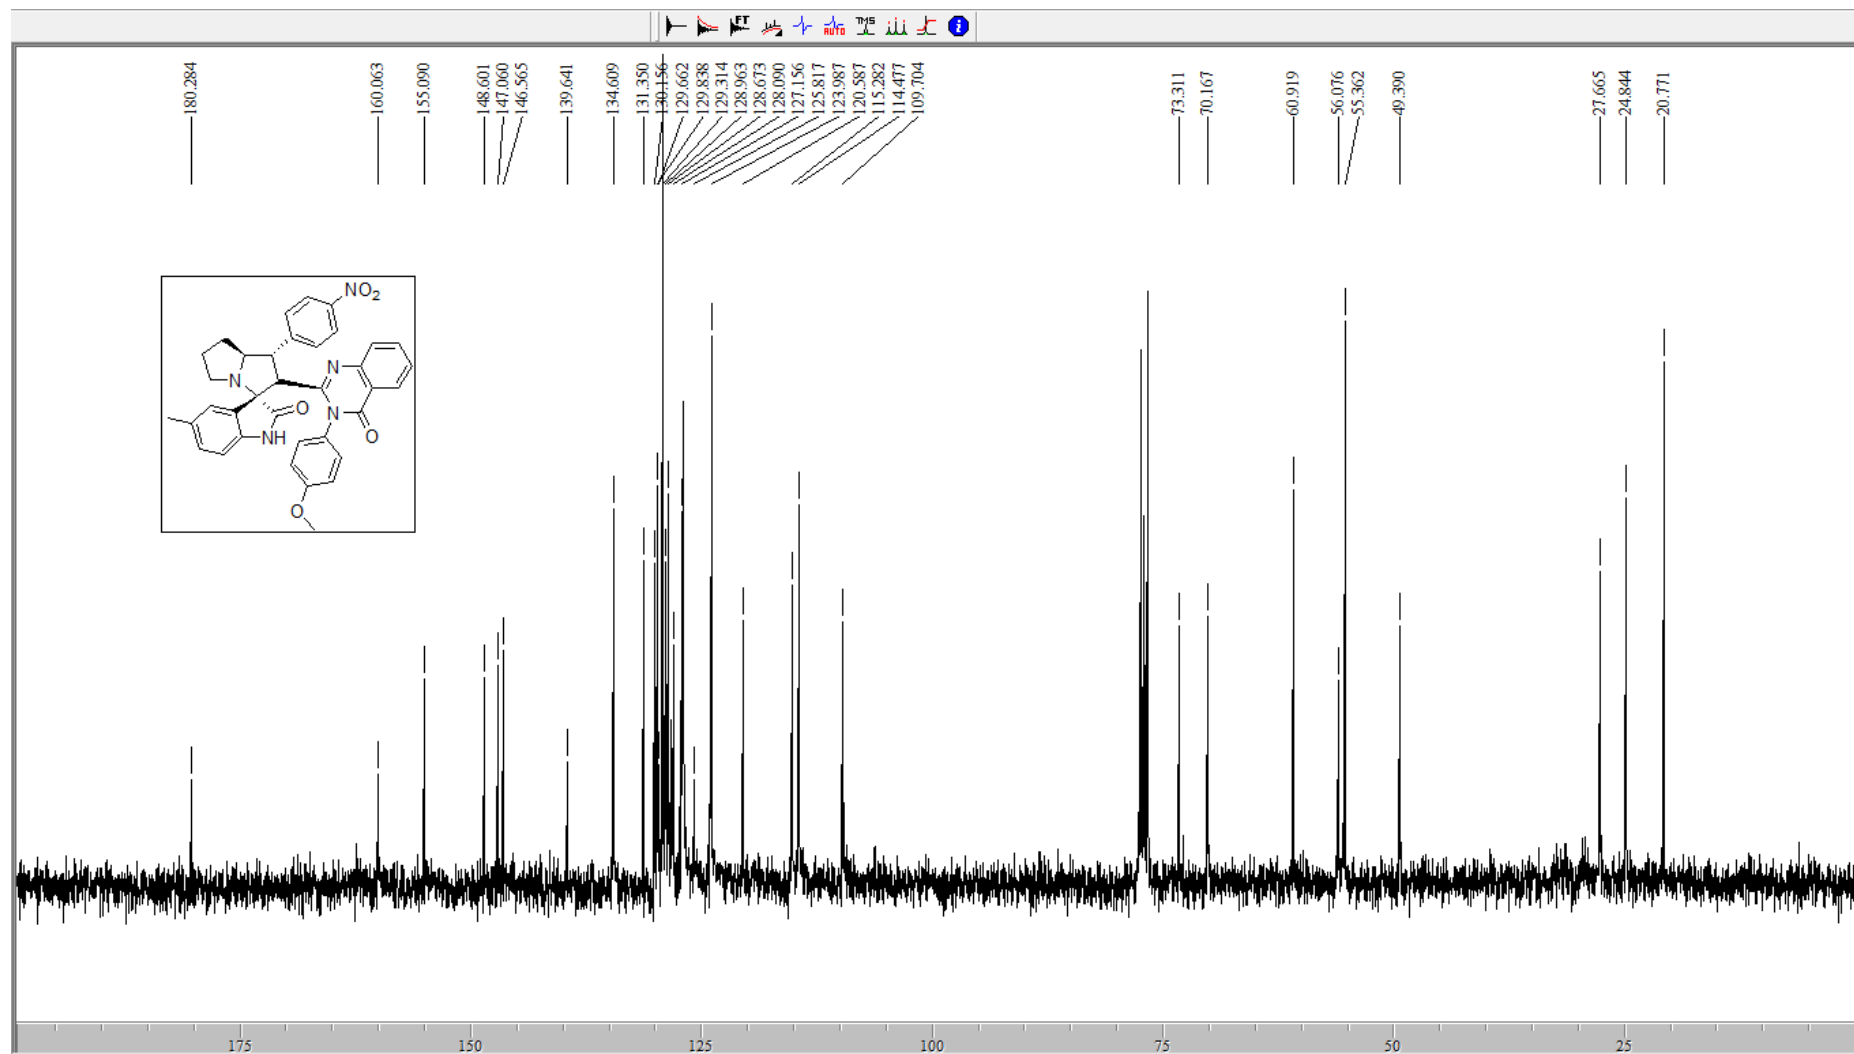

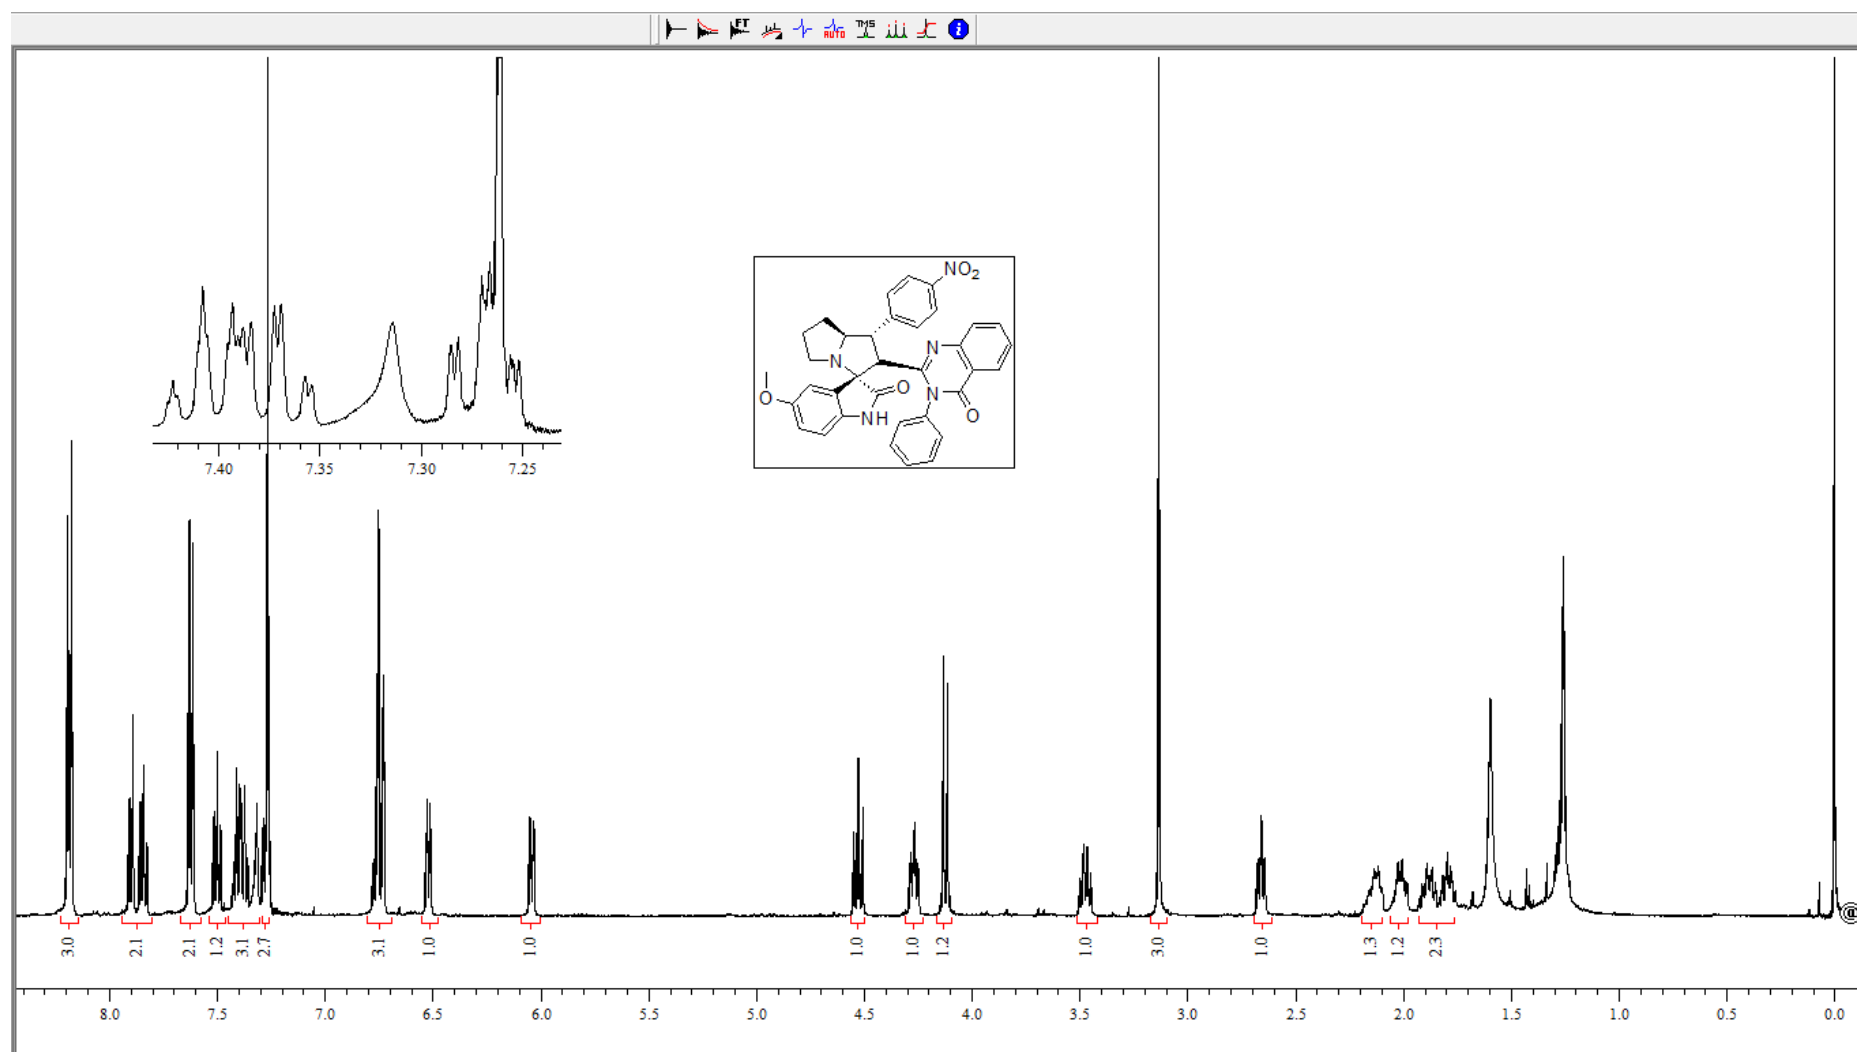



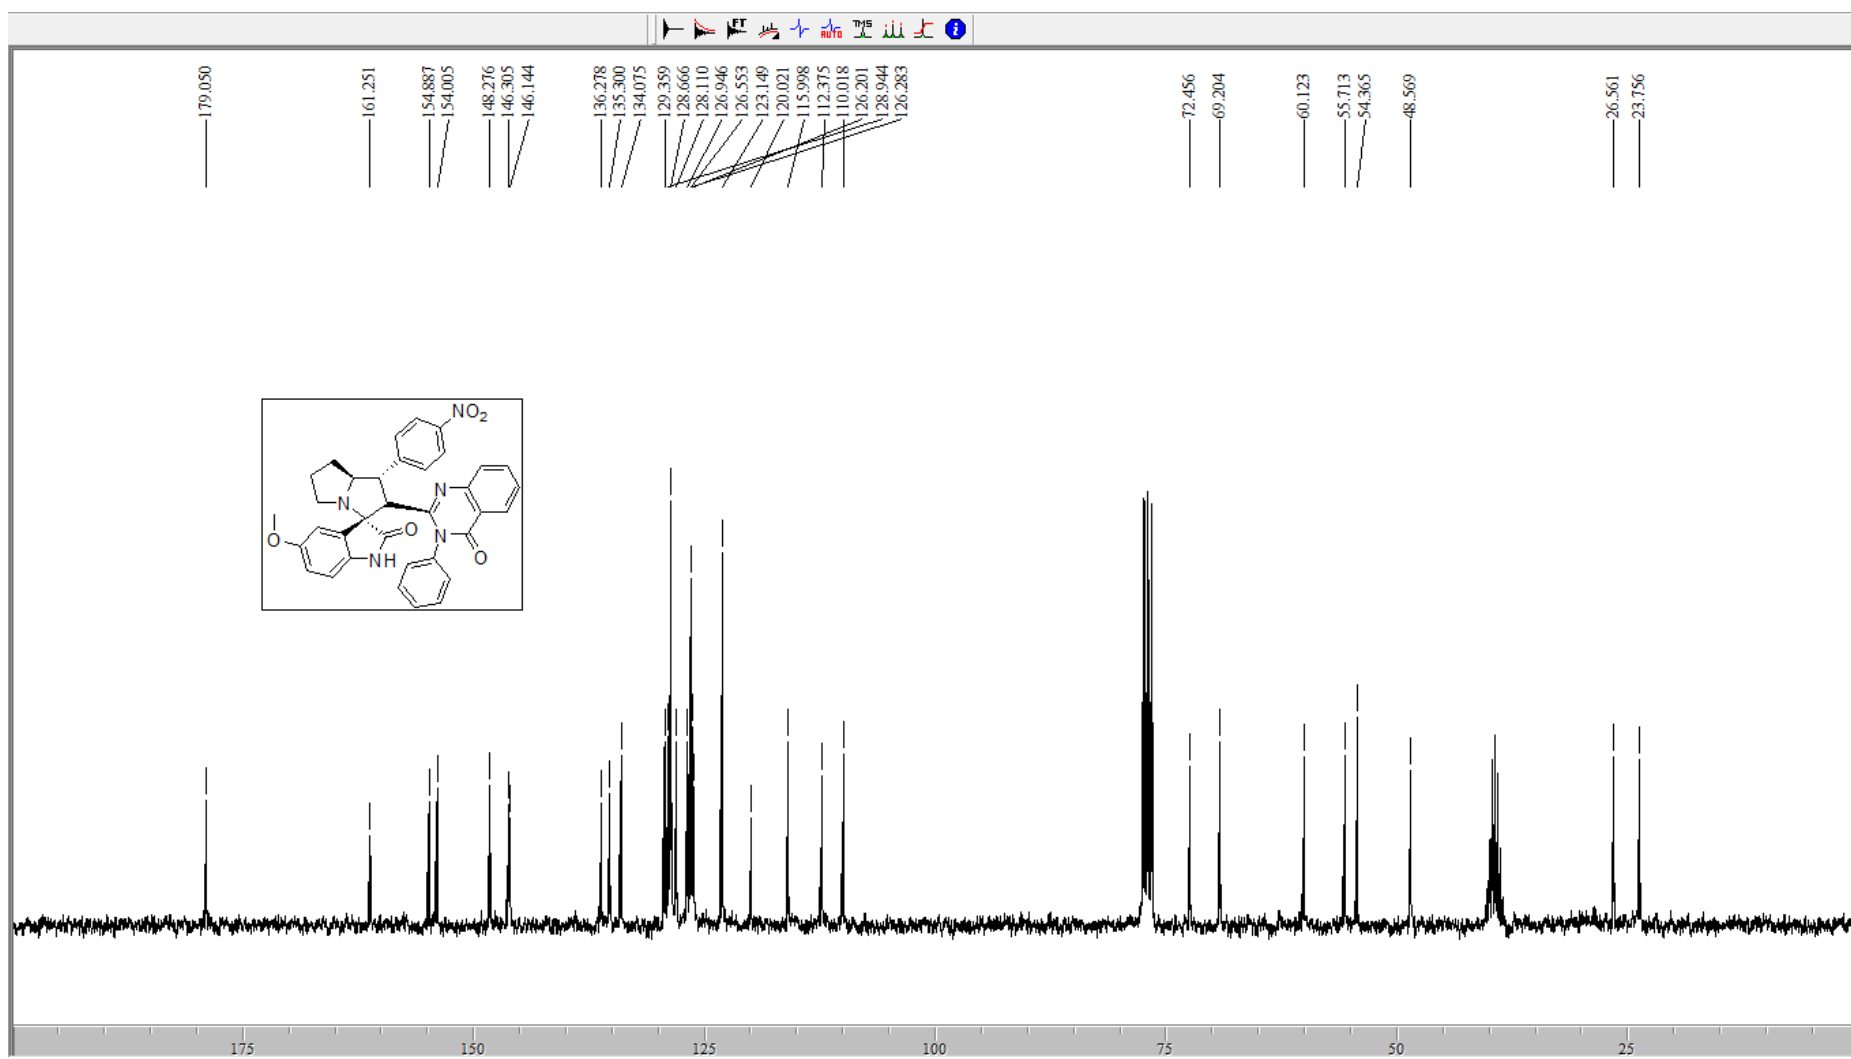

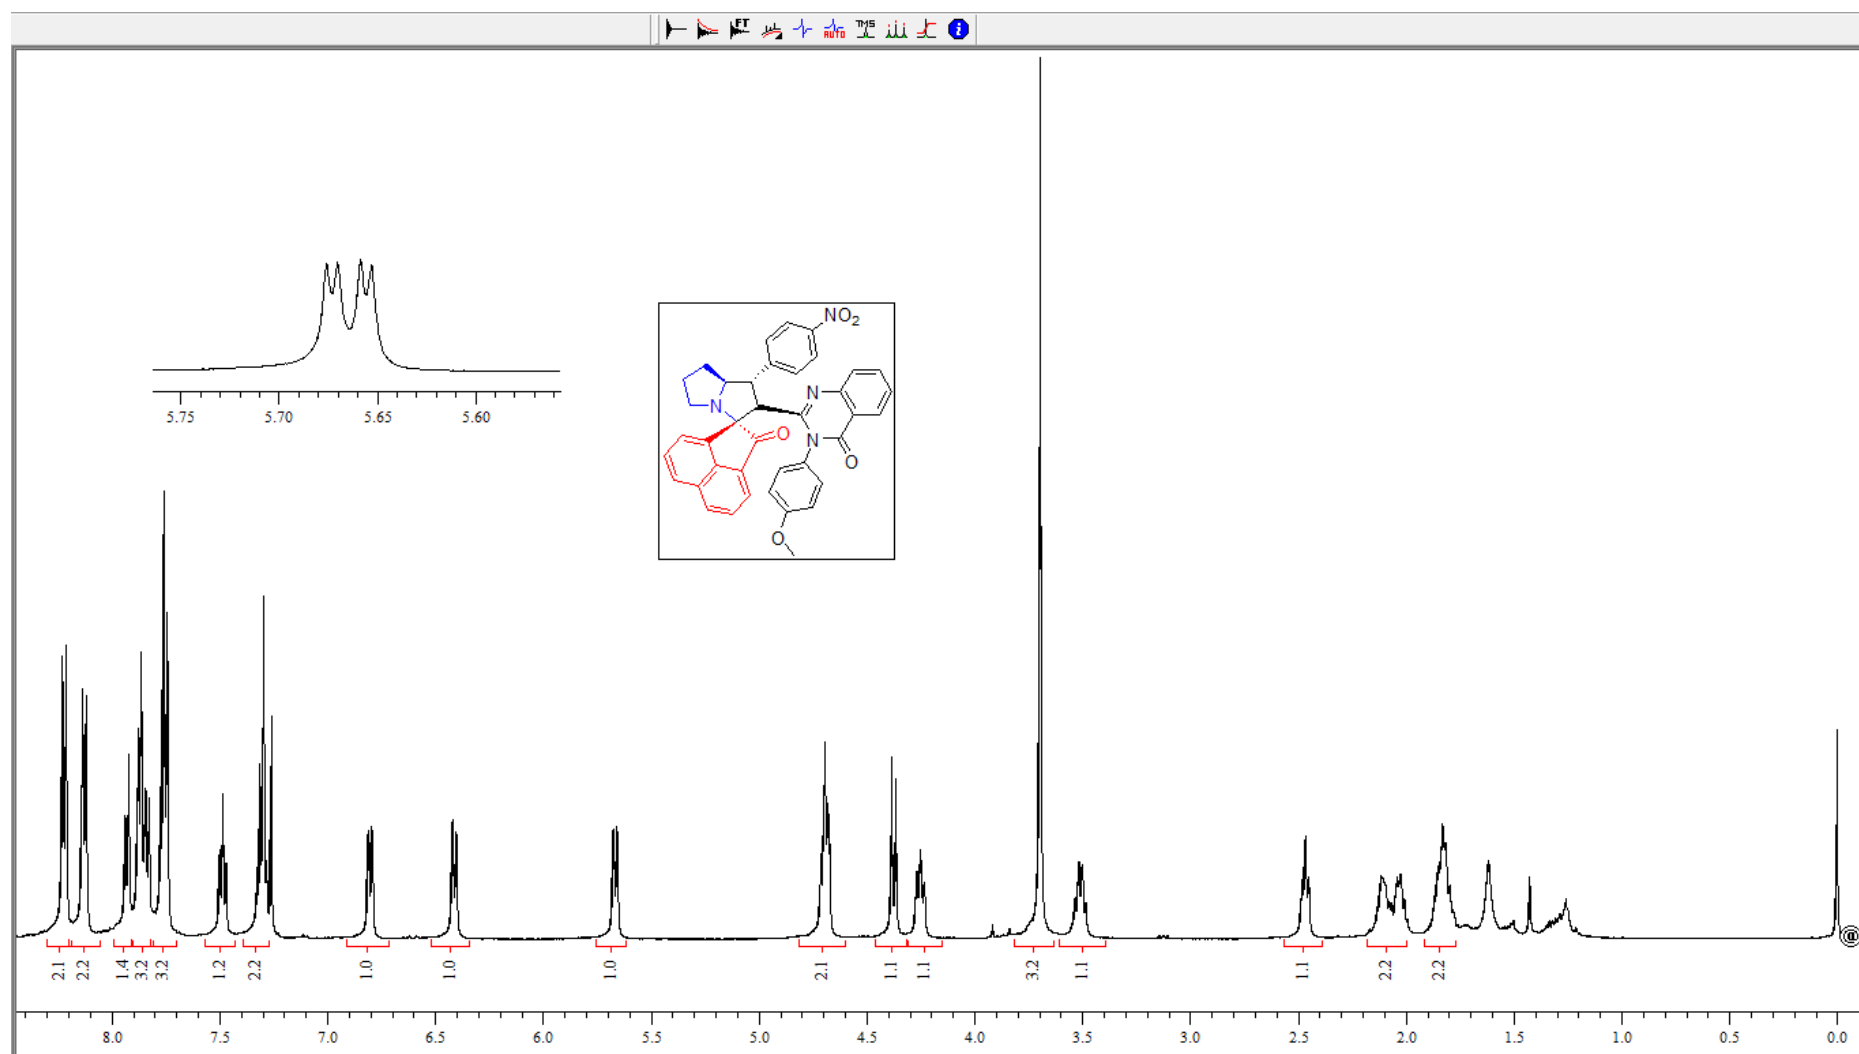

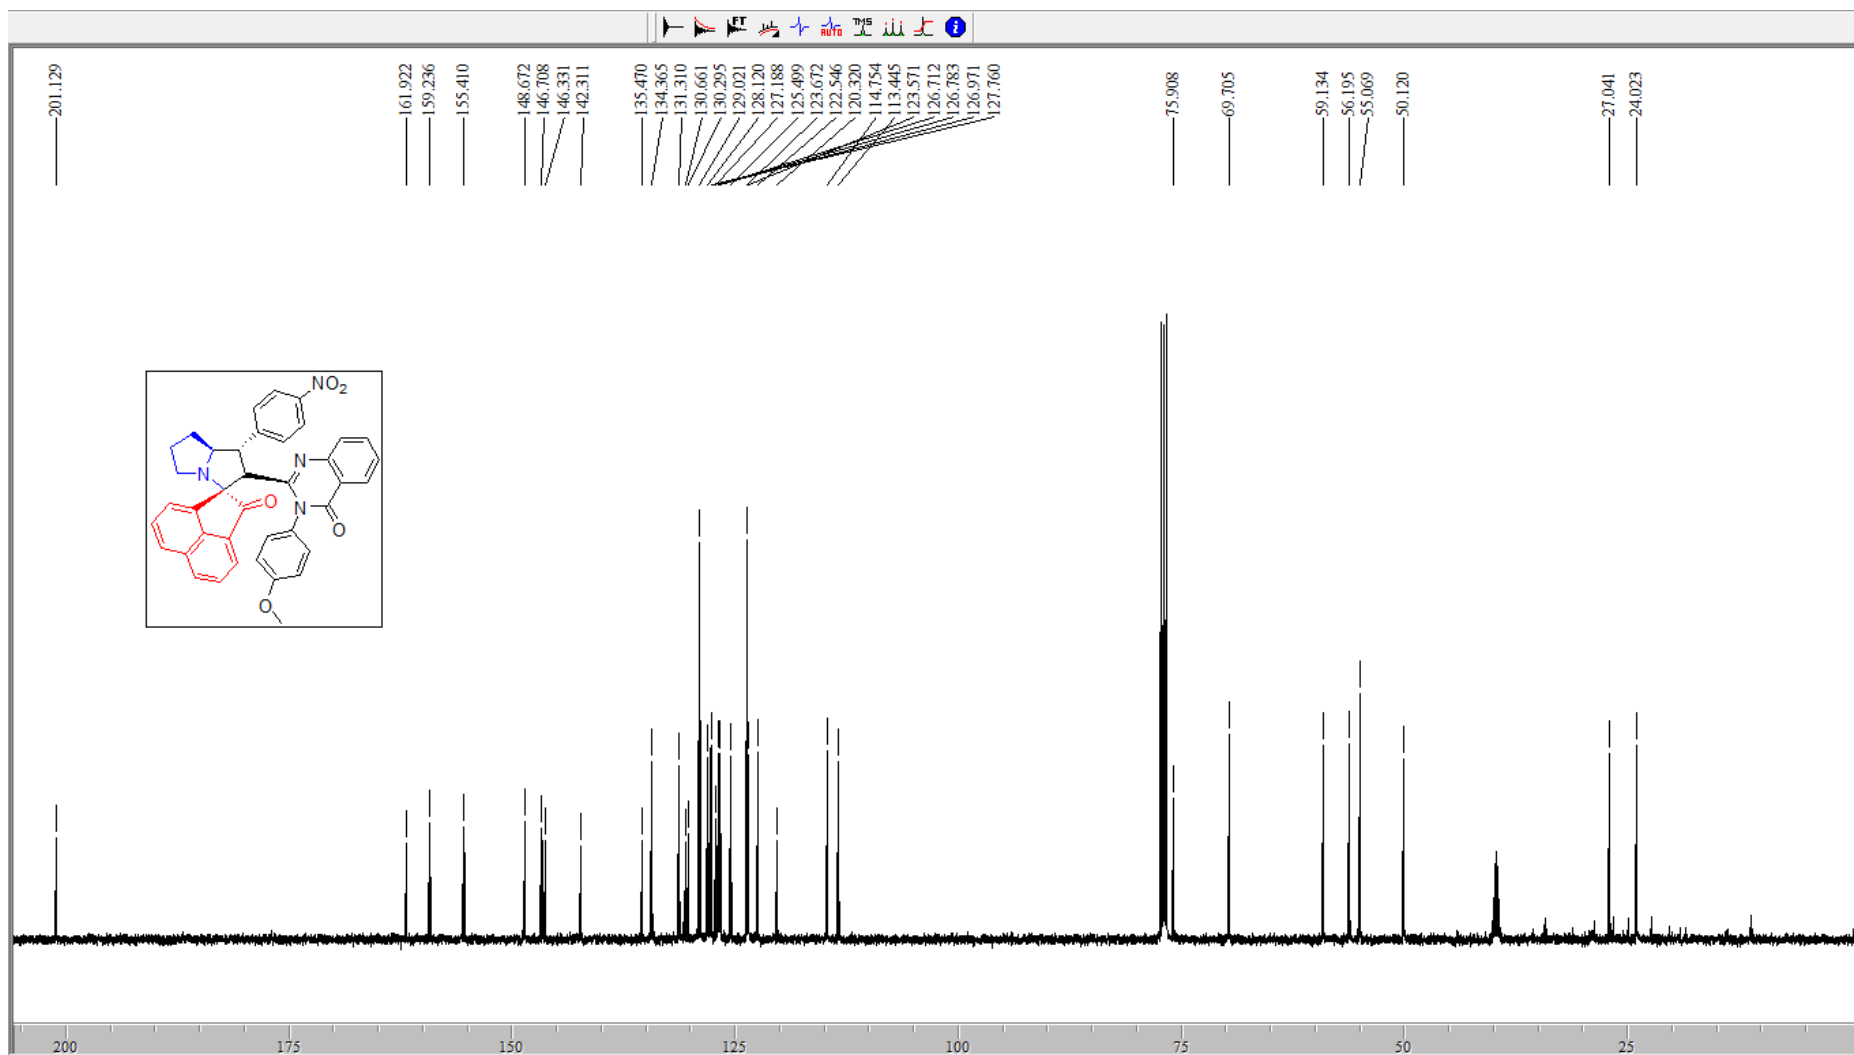

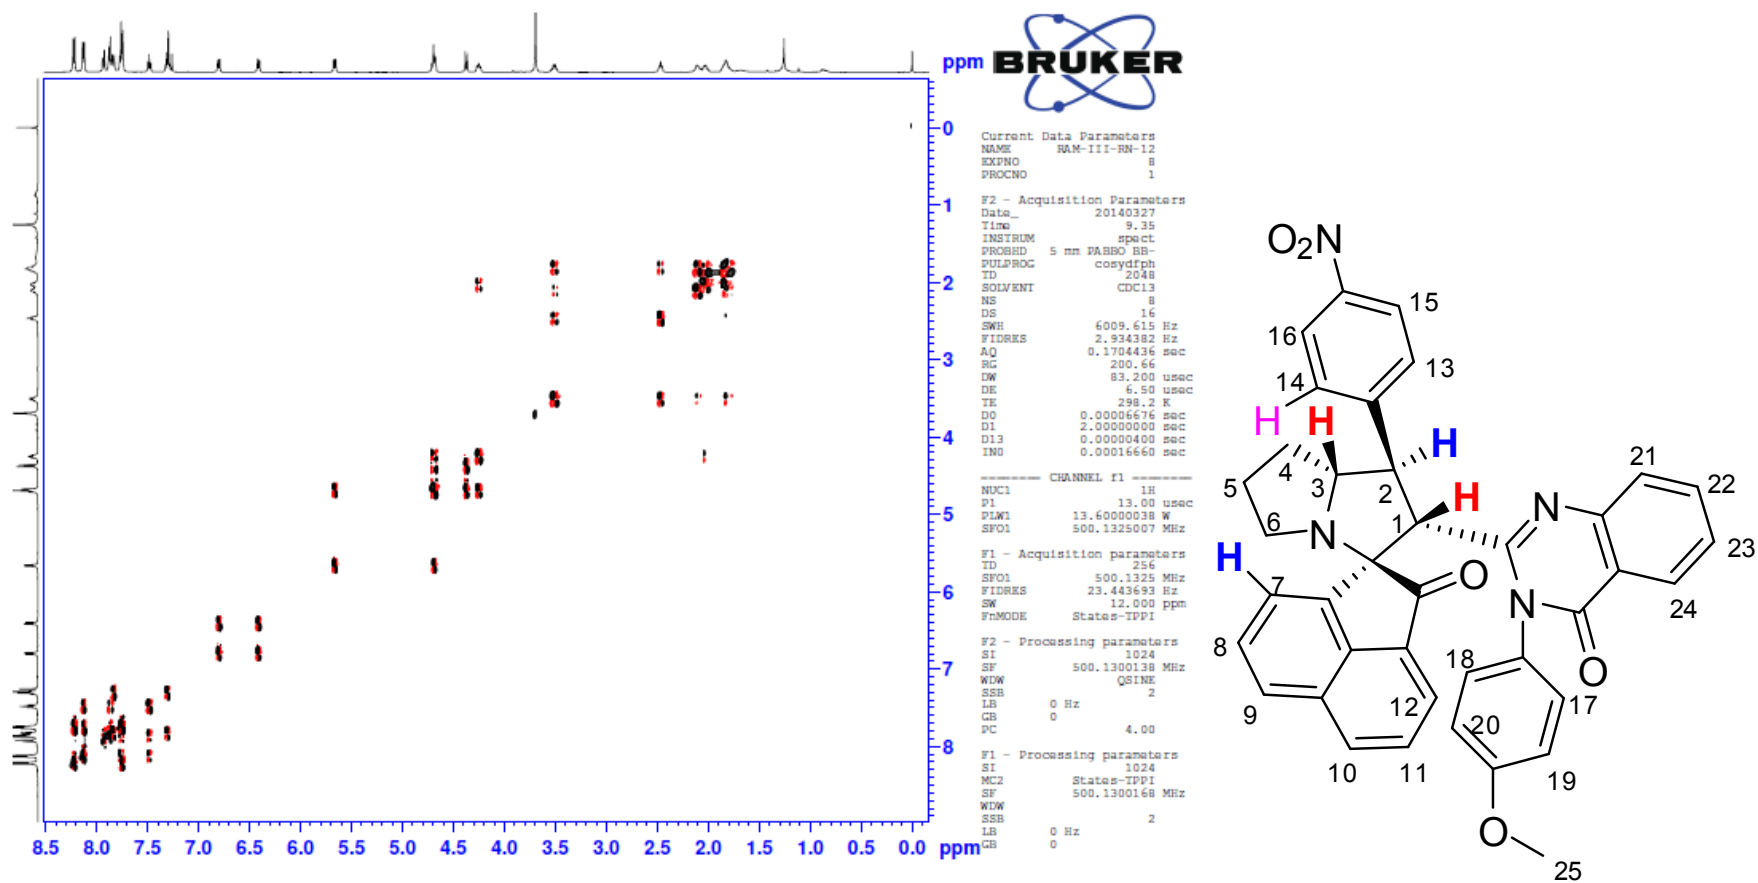2D Double Quantum Filtered Correlation Spectroscopy (DQF-COSY) spectrum of compound **4p**

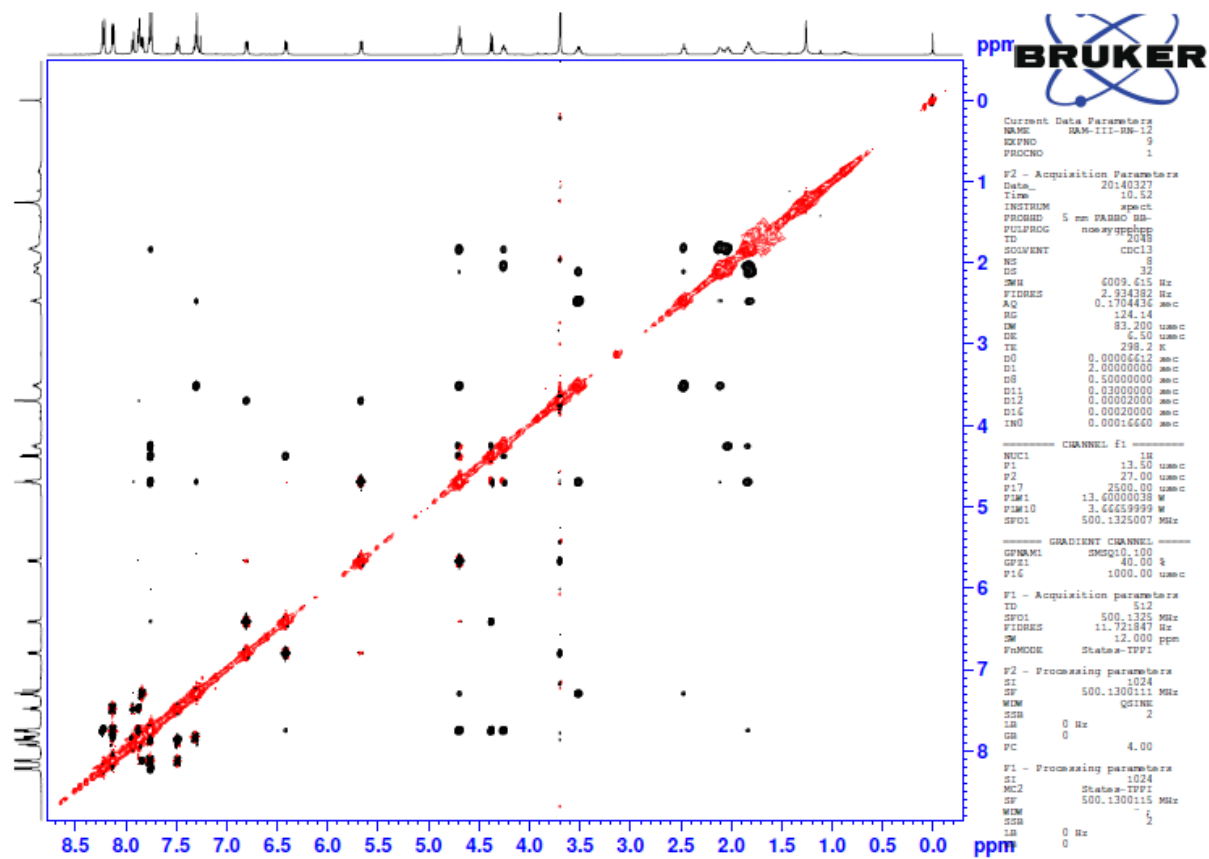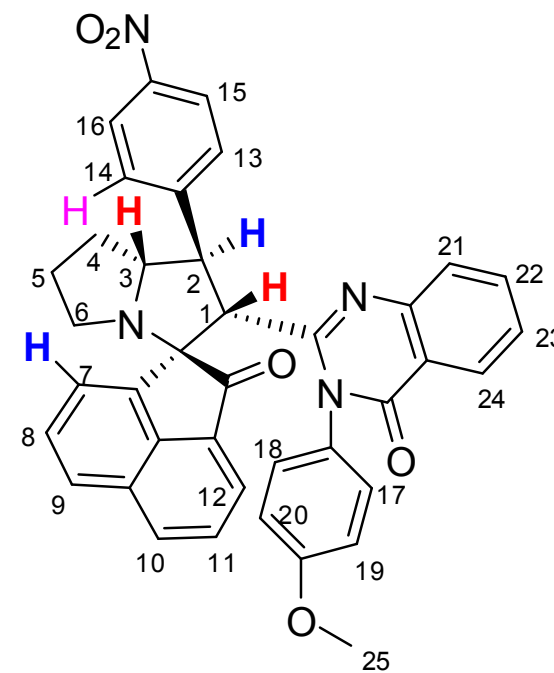

2D NOESY (Nuclear Overhauser effect spectroscopy) of compound **4p**
